# Supplementary figures and images for: Stereoselective synthesis of optically active bicyclic β-lactam carboxylic acids that target pilus biogenesis in pathogenic bacteriaElectronic supplementary information (ESI) available: 13C NMR spectra of 7(a–g), 10–14, 16(a and d) and 17(a–b). See http://www.rsc.org/suppdata/ob/b2/b210551a/
Source: Royal Society of Chemistry journal article supplement (doi:10.1039/b210551a), 2003-03-11

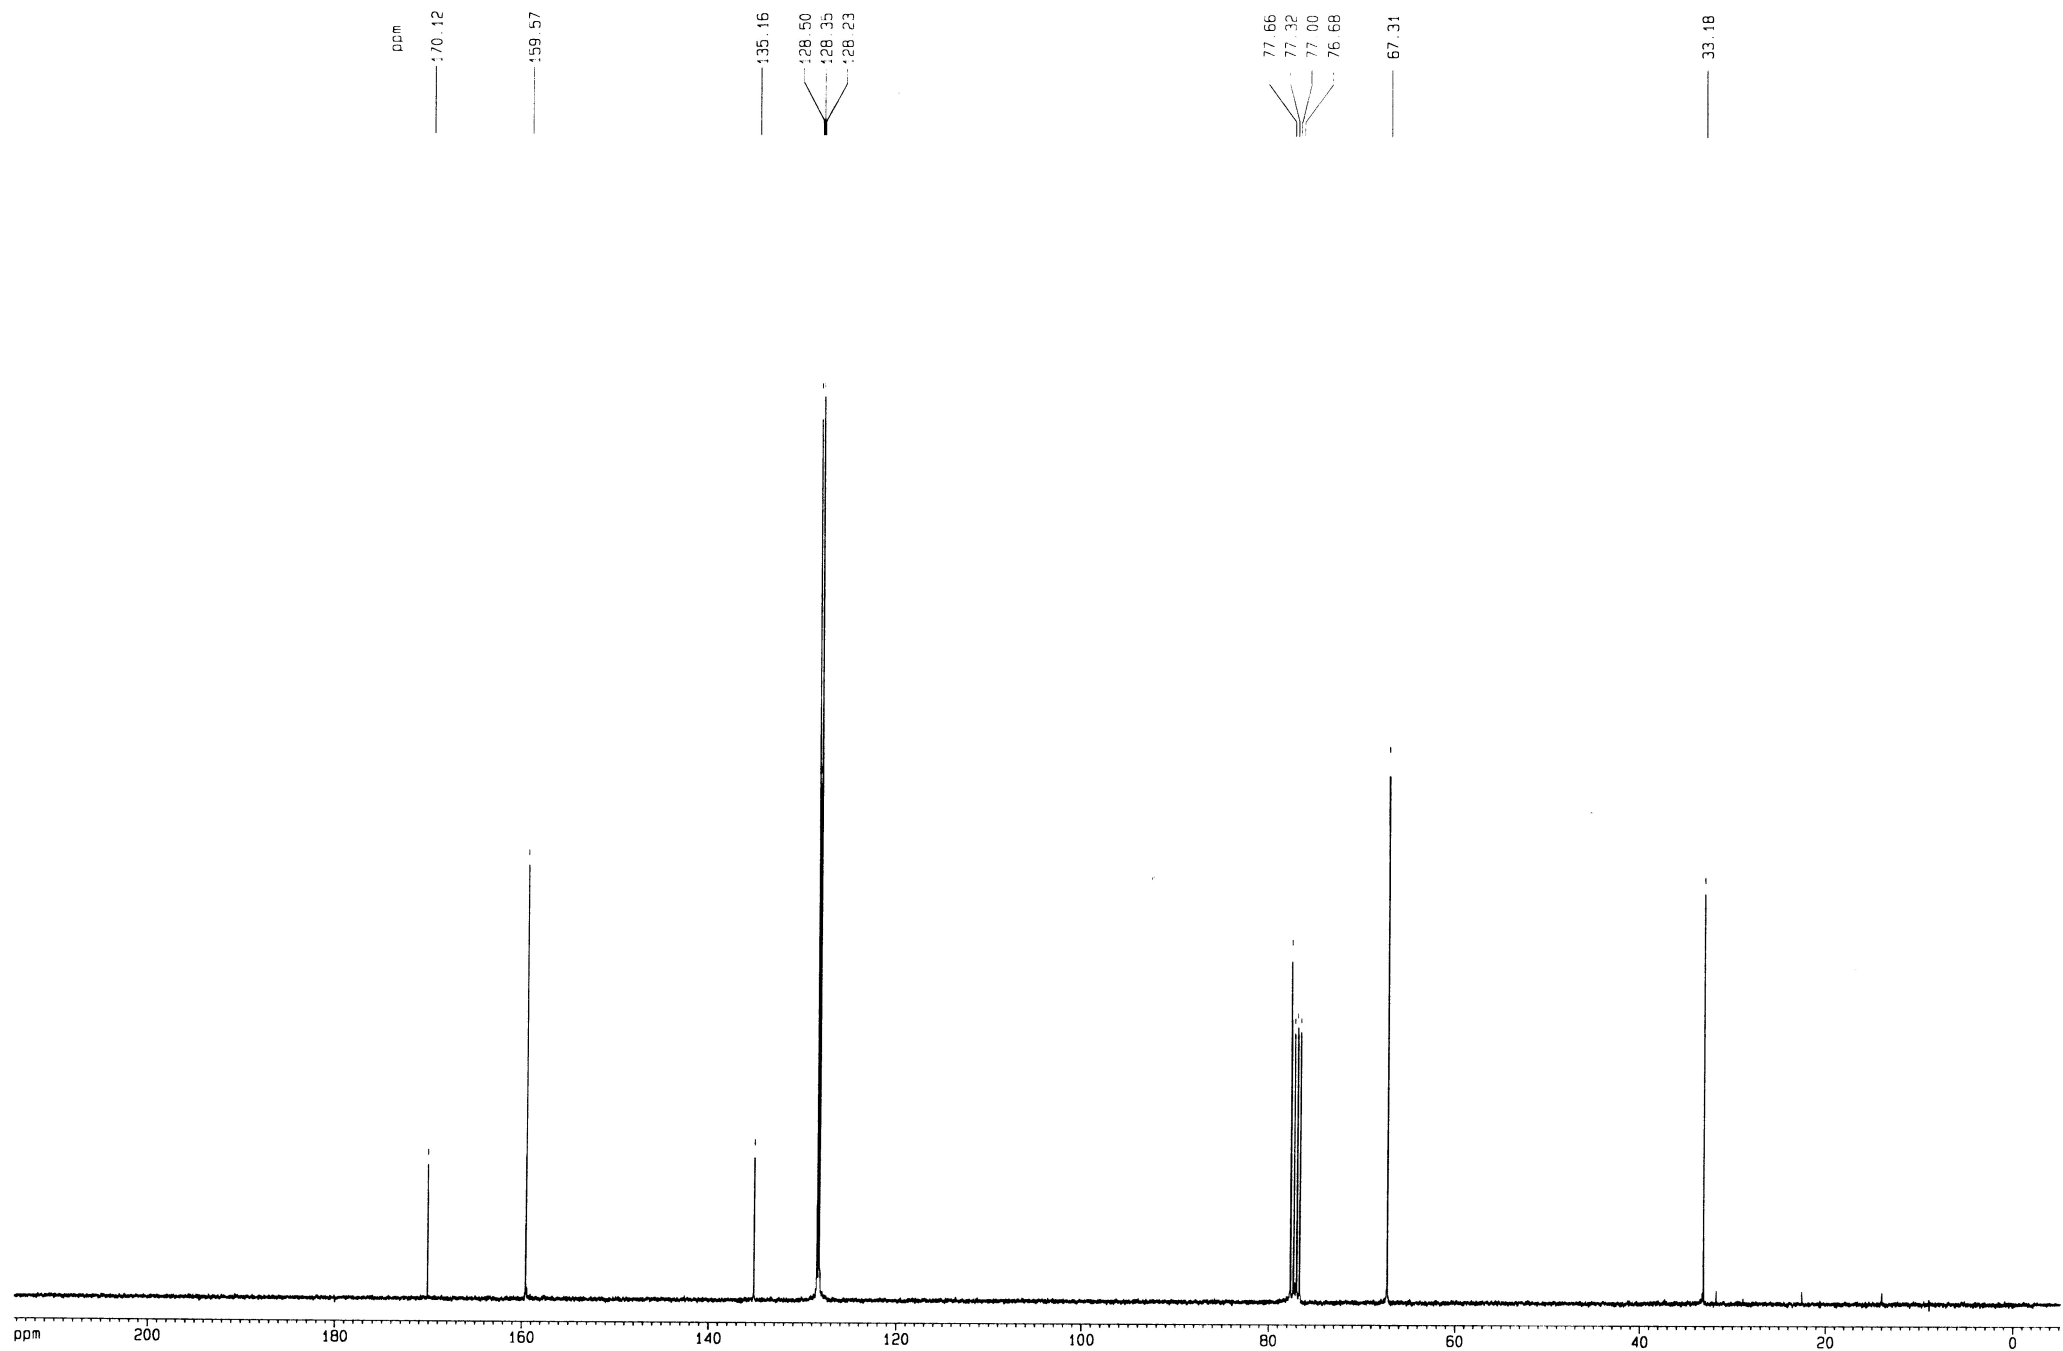

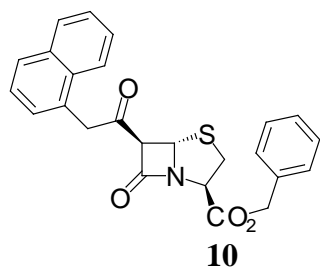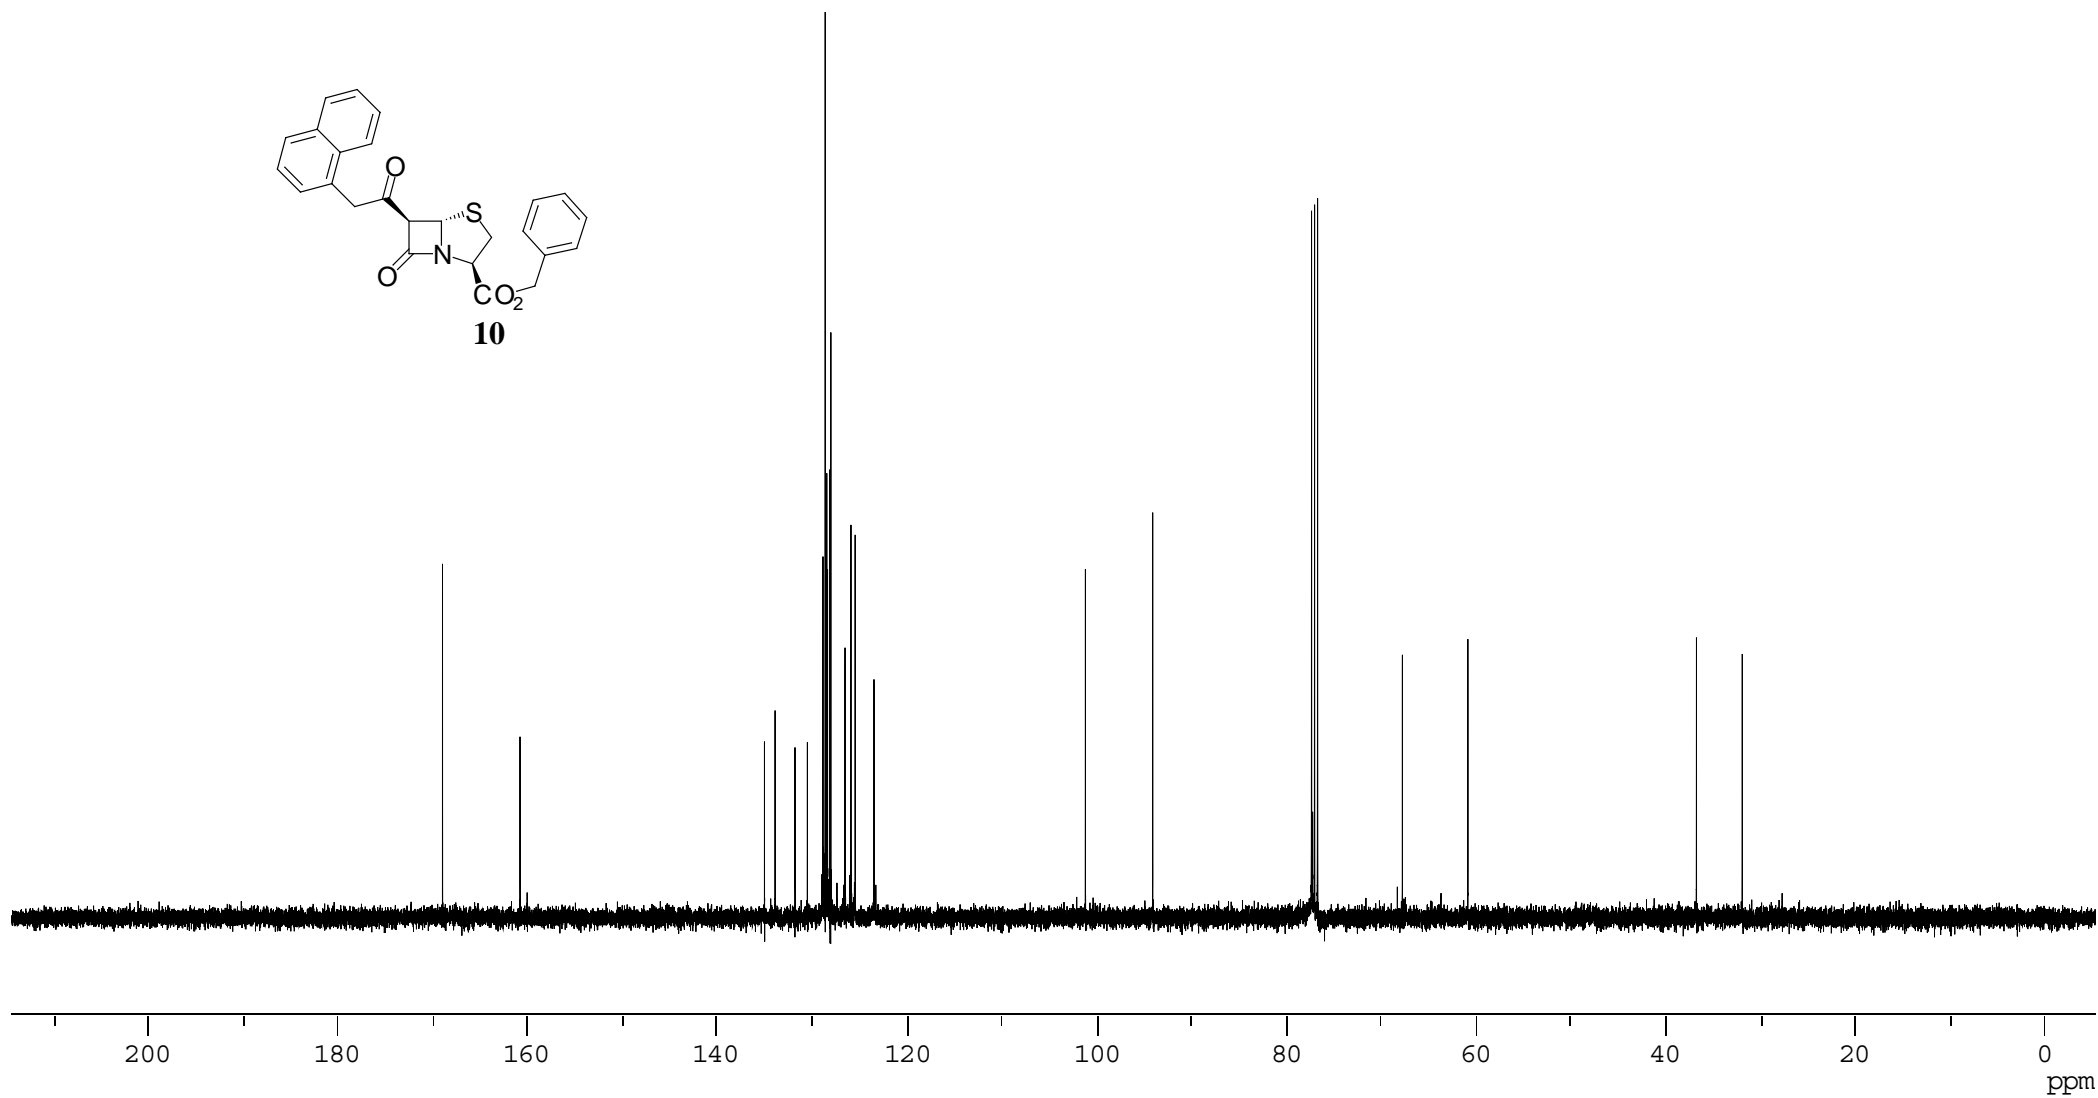

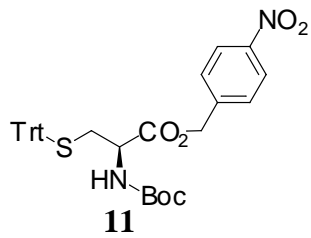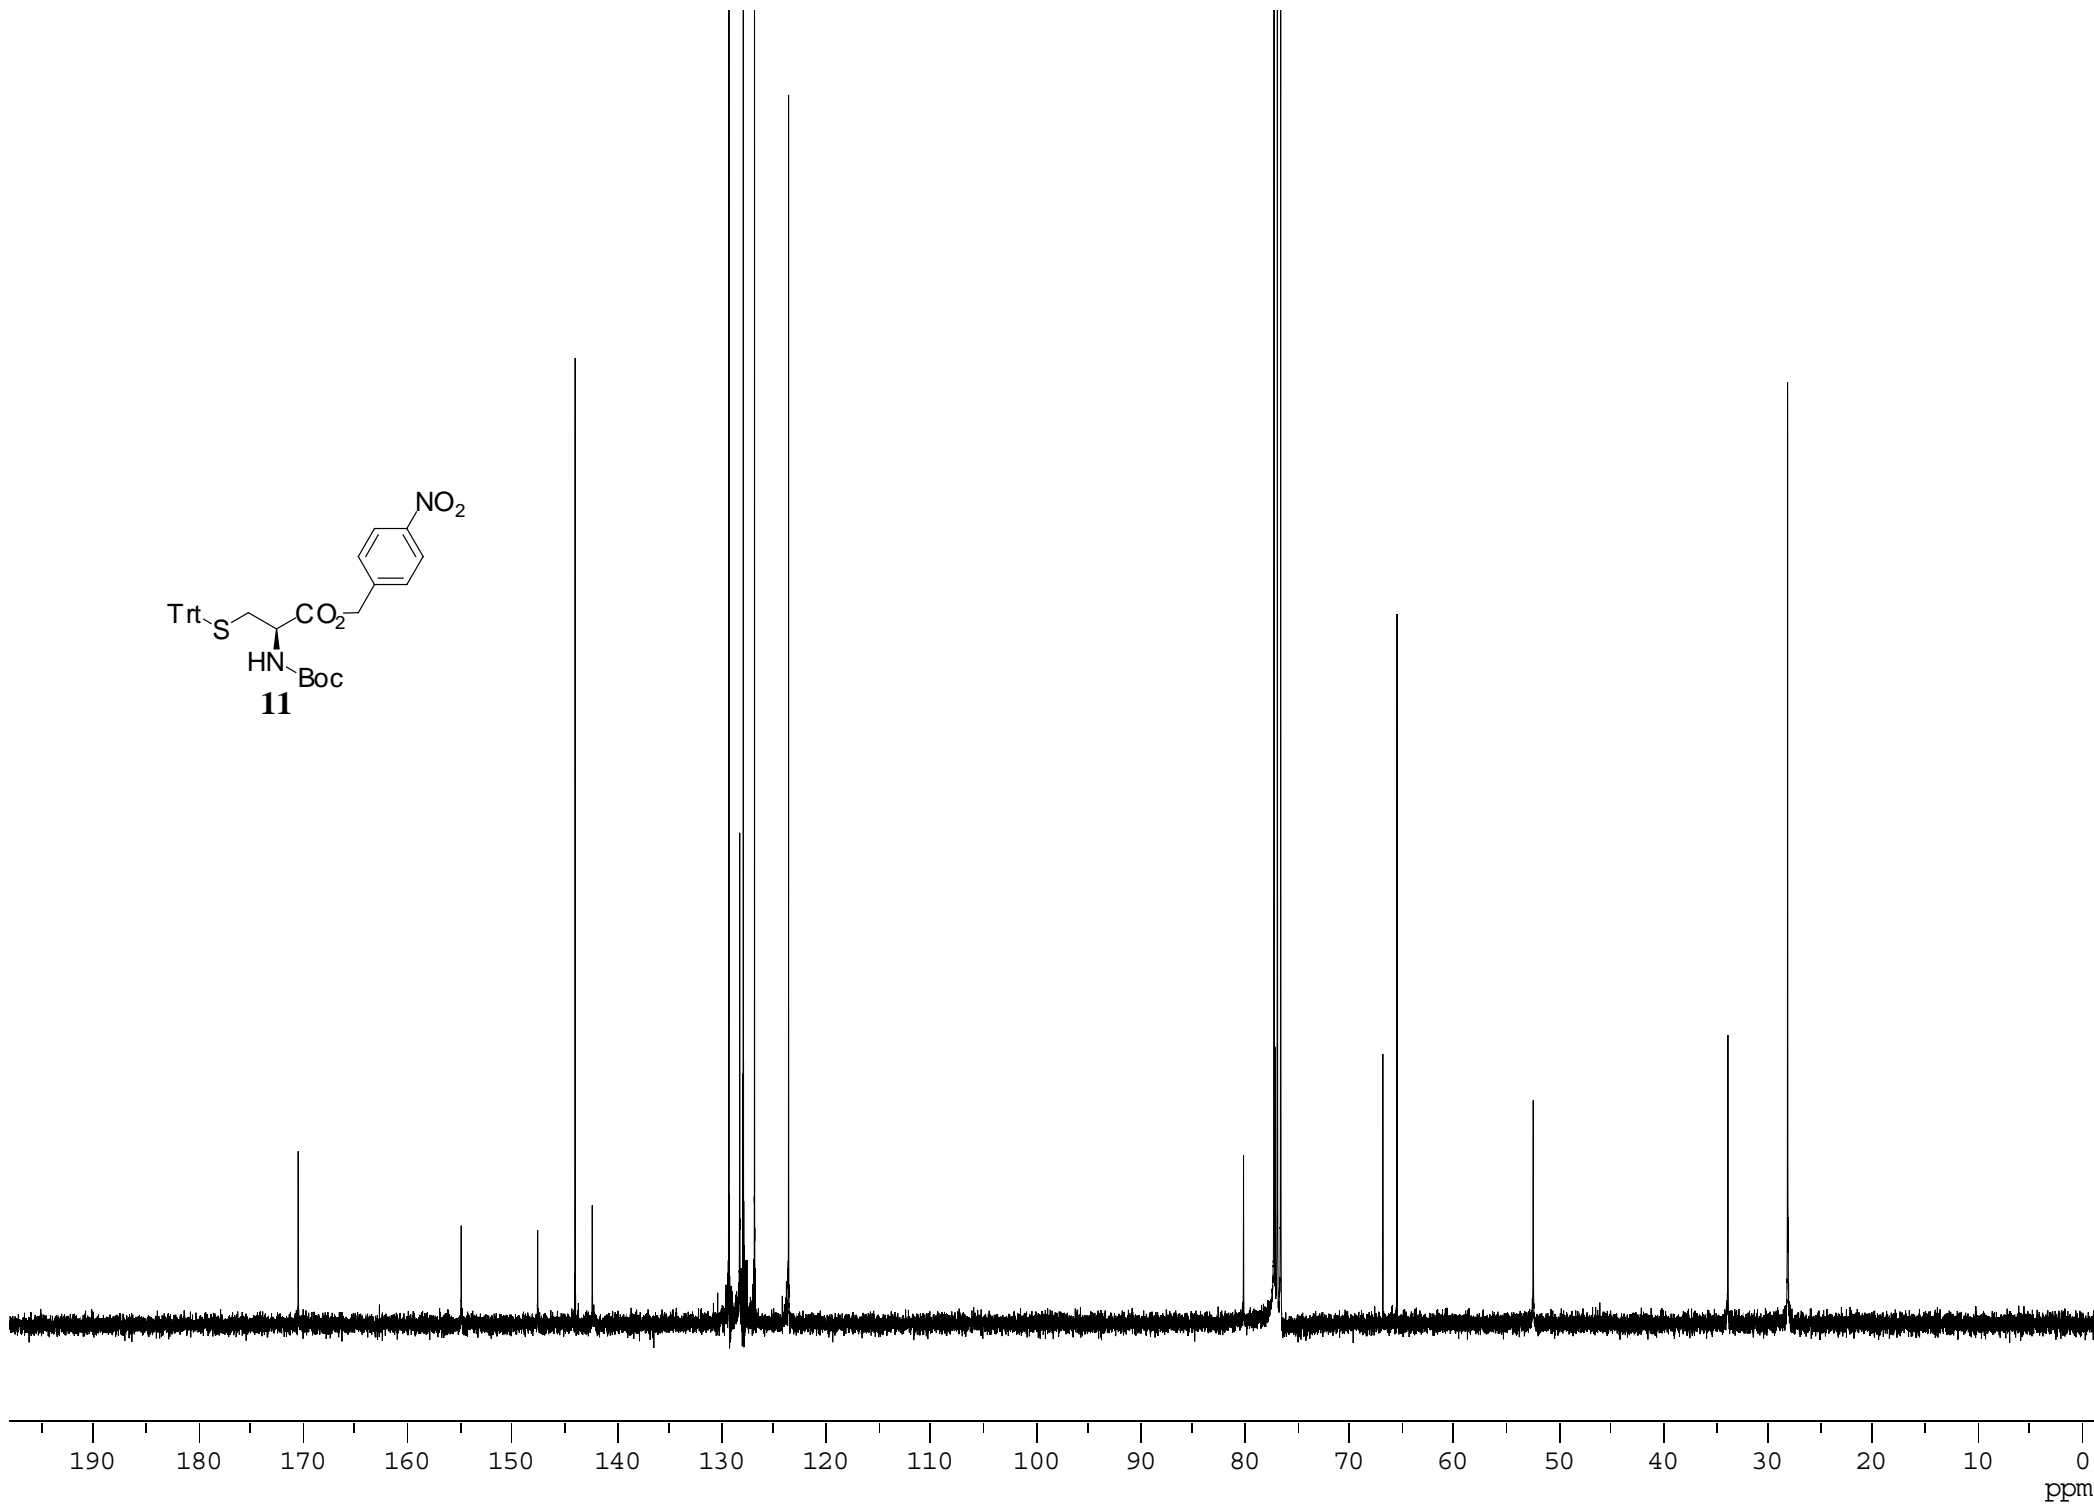

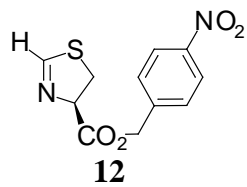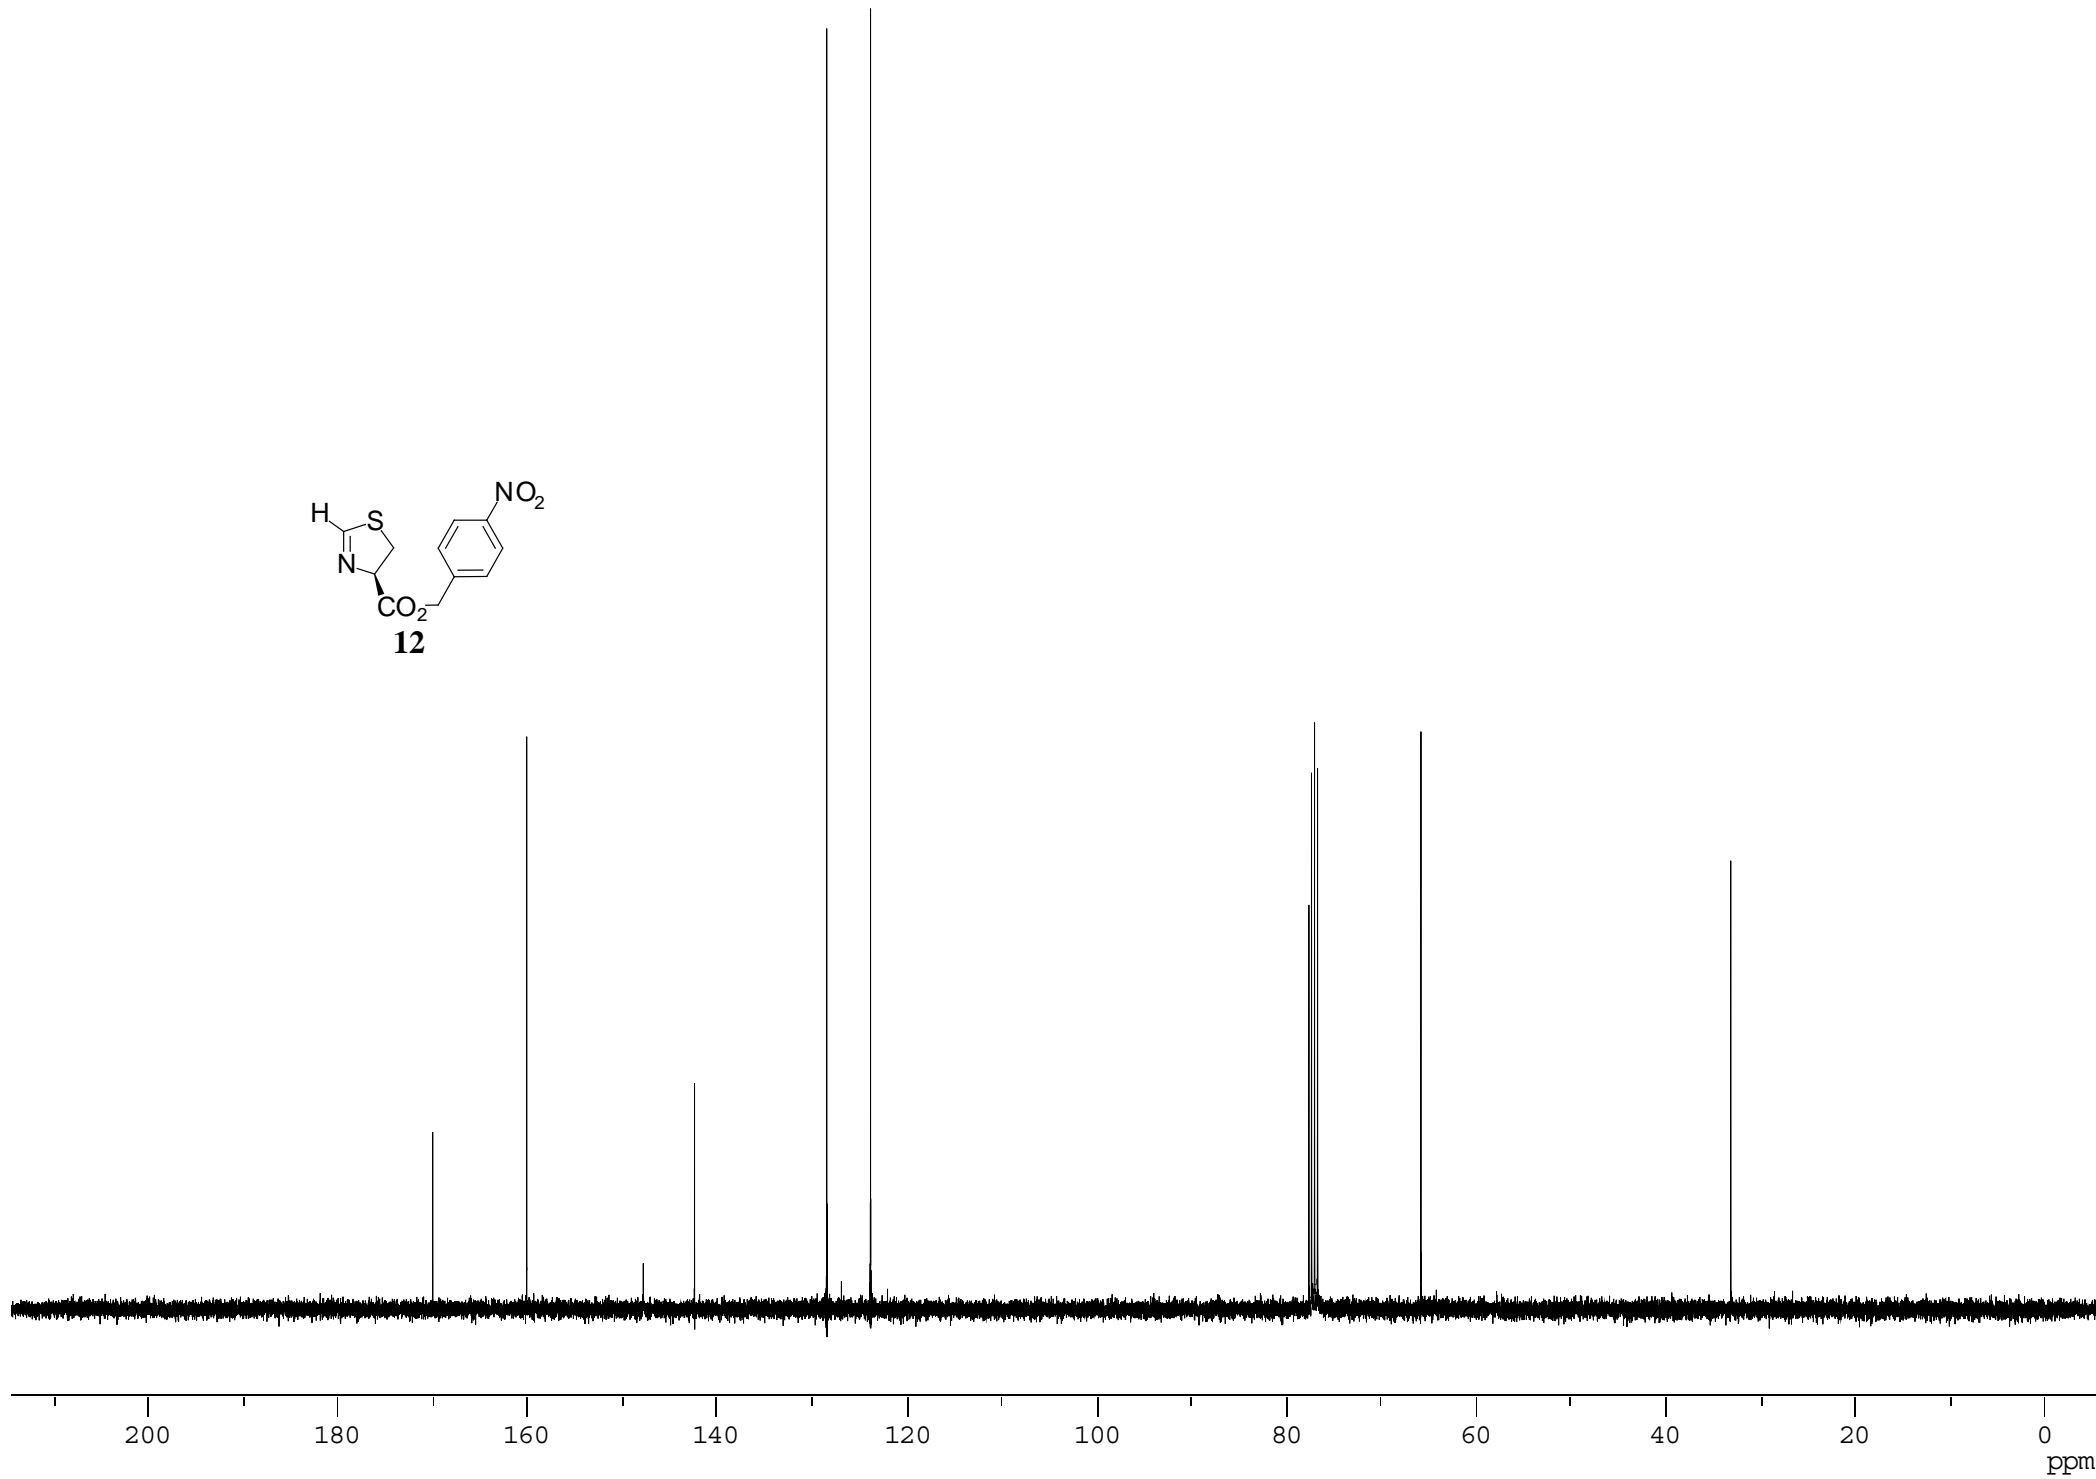



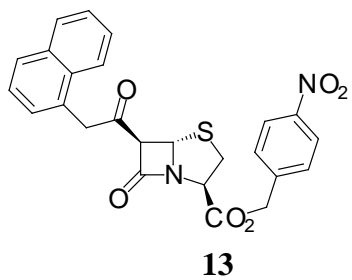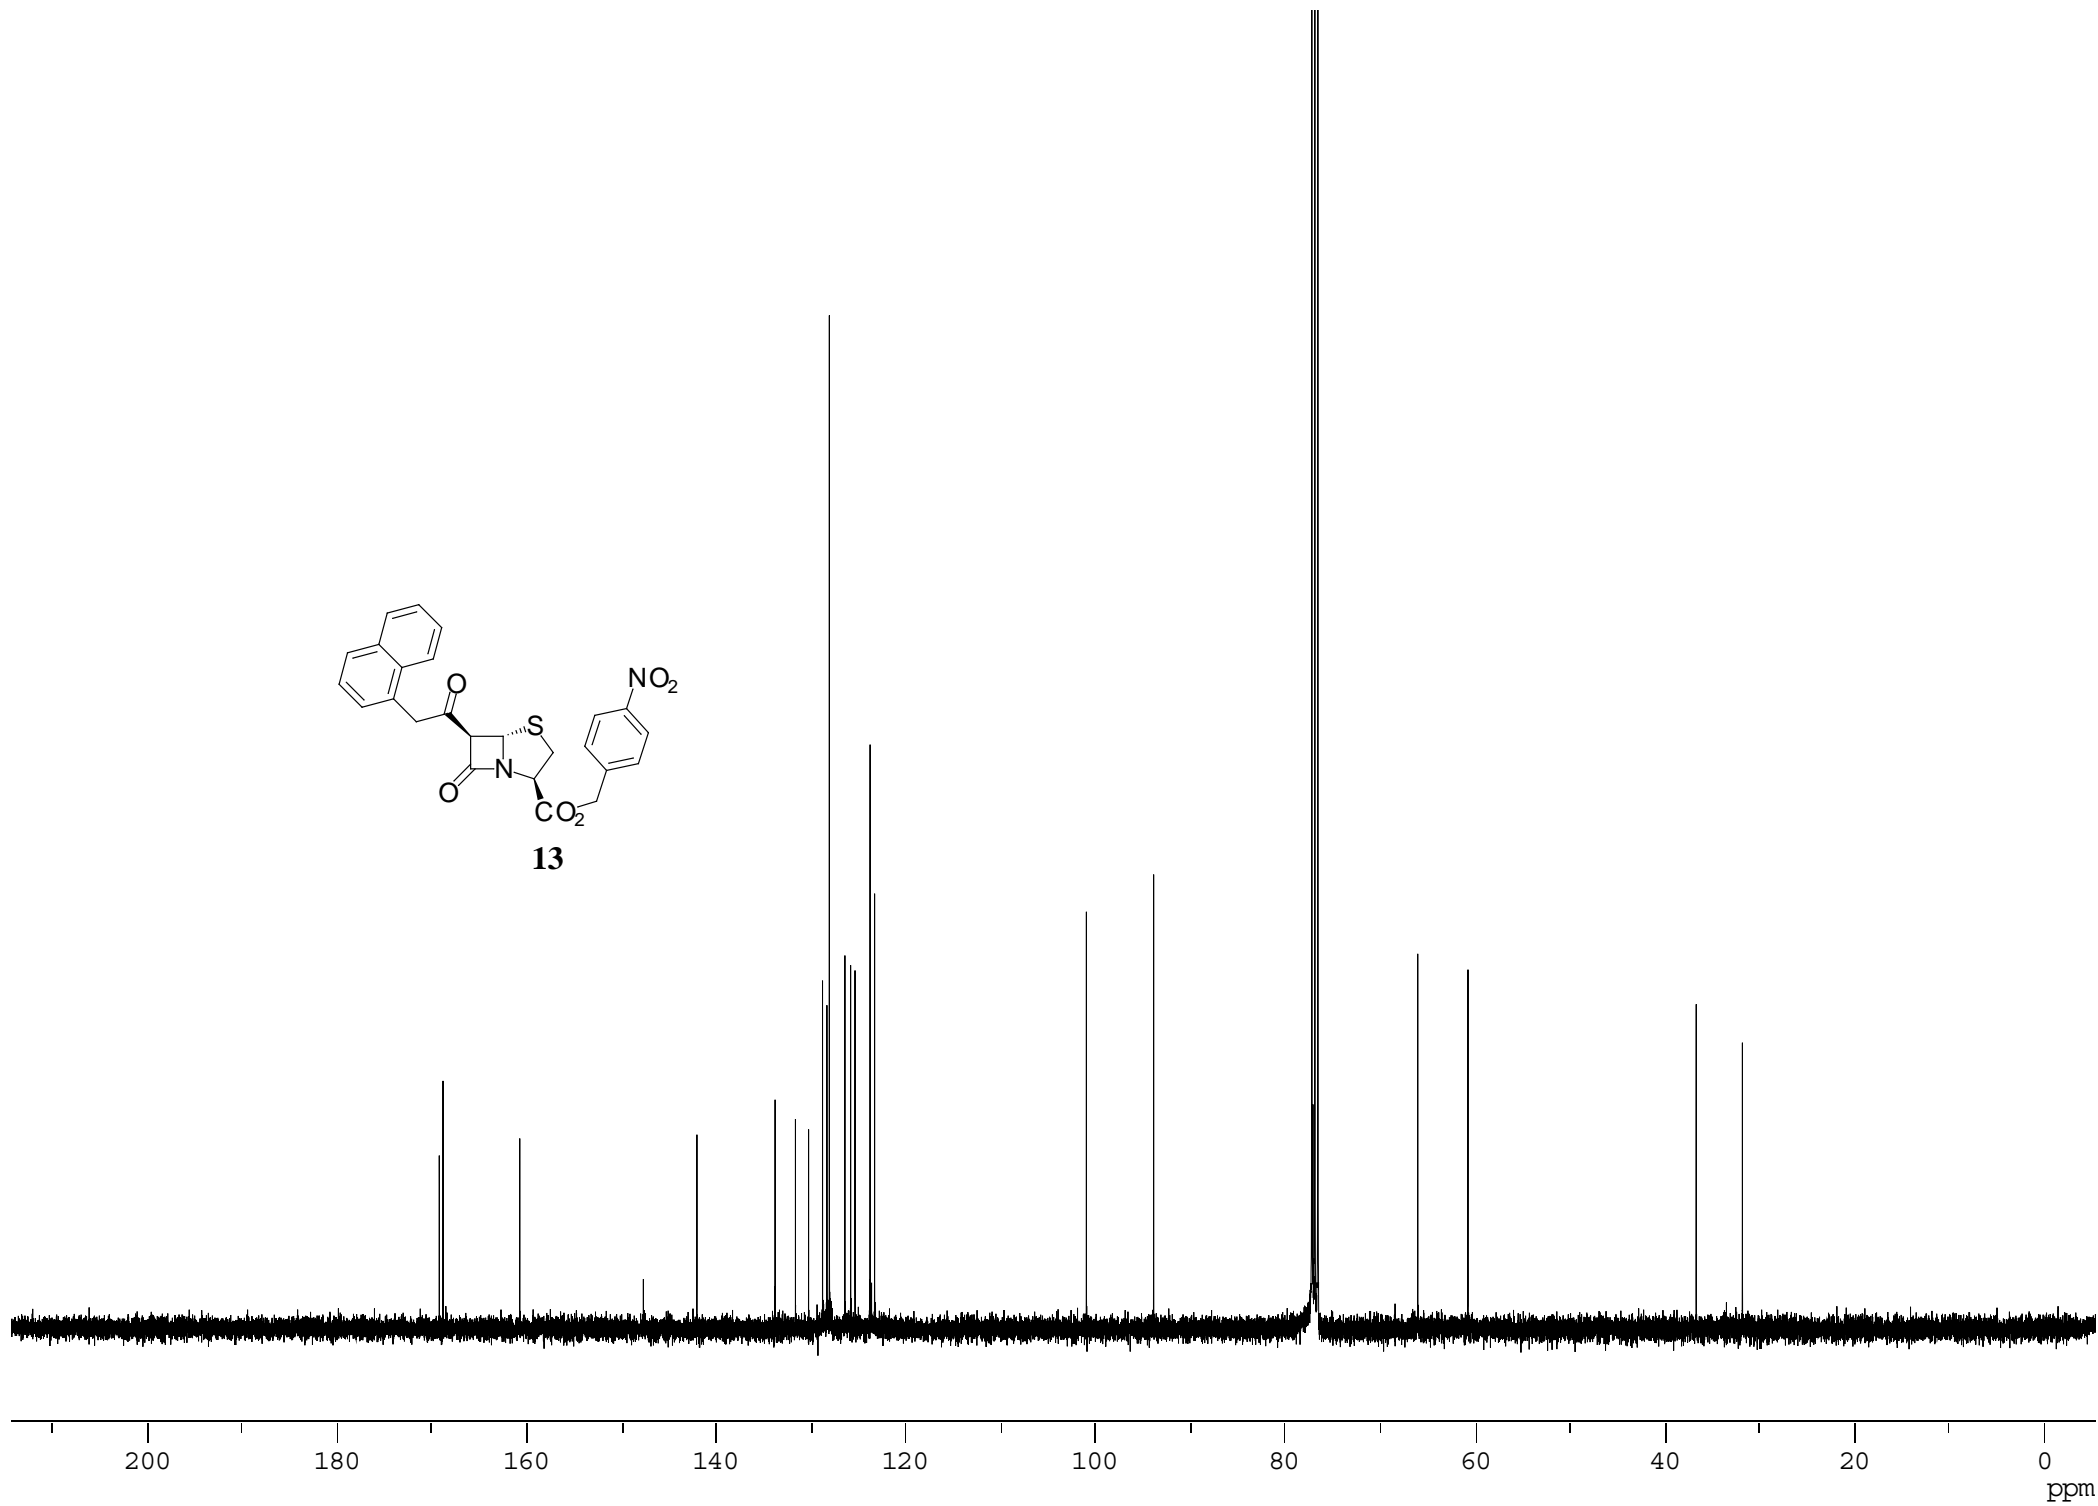

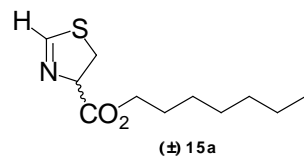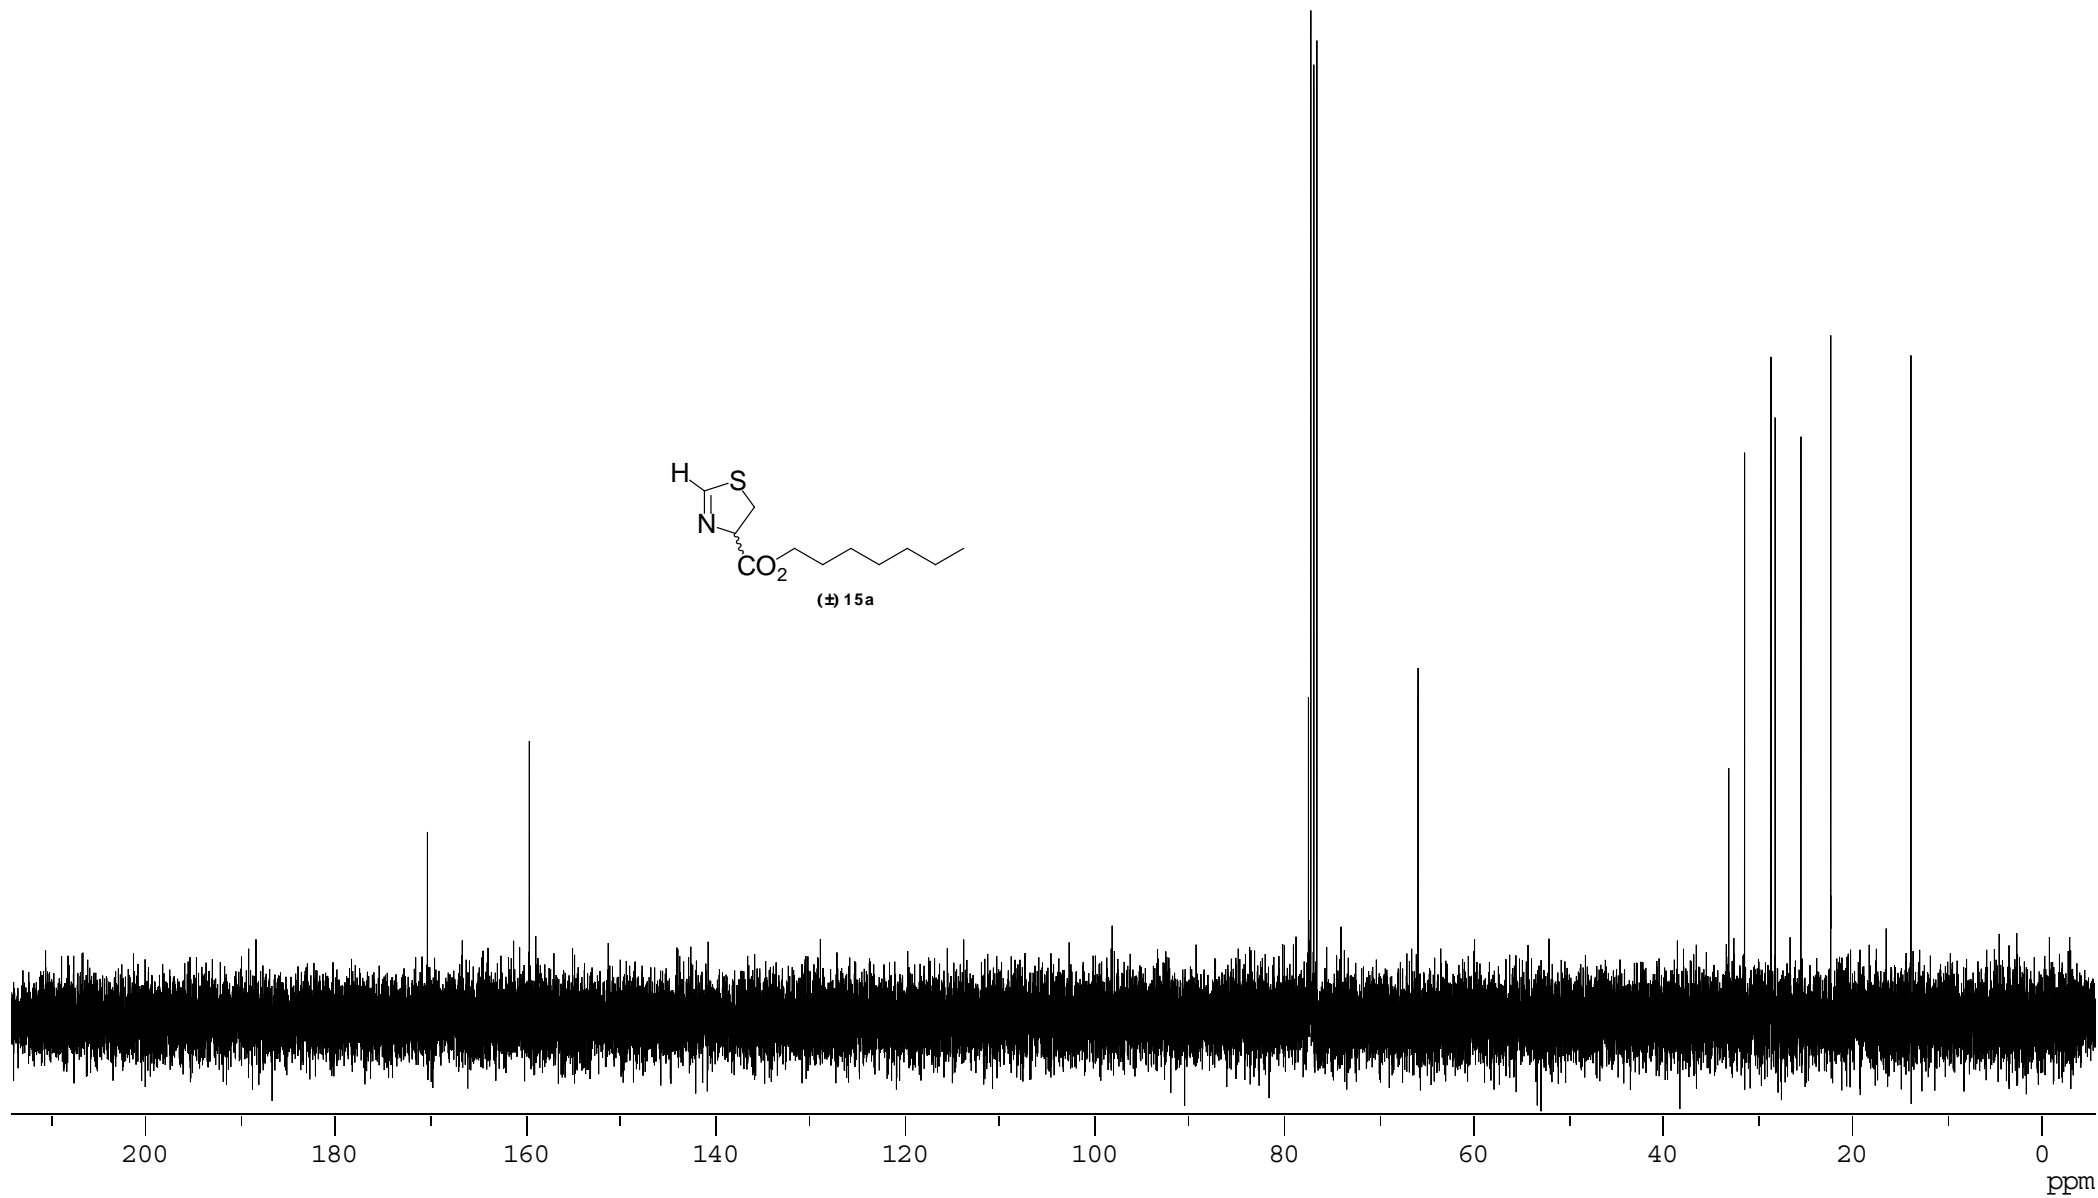

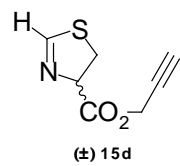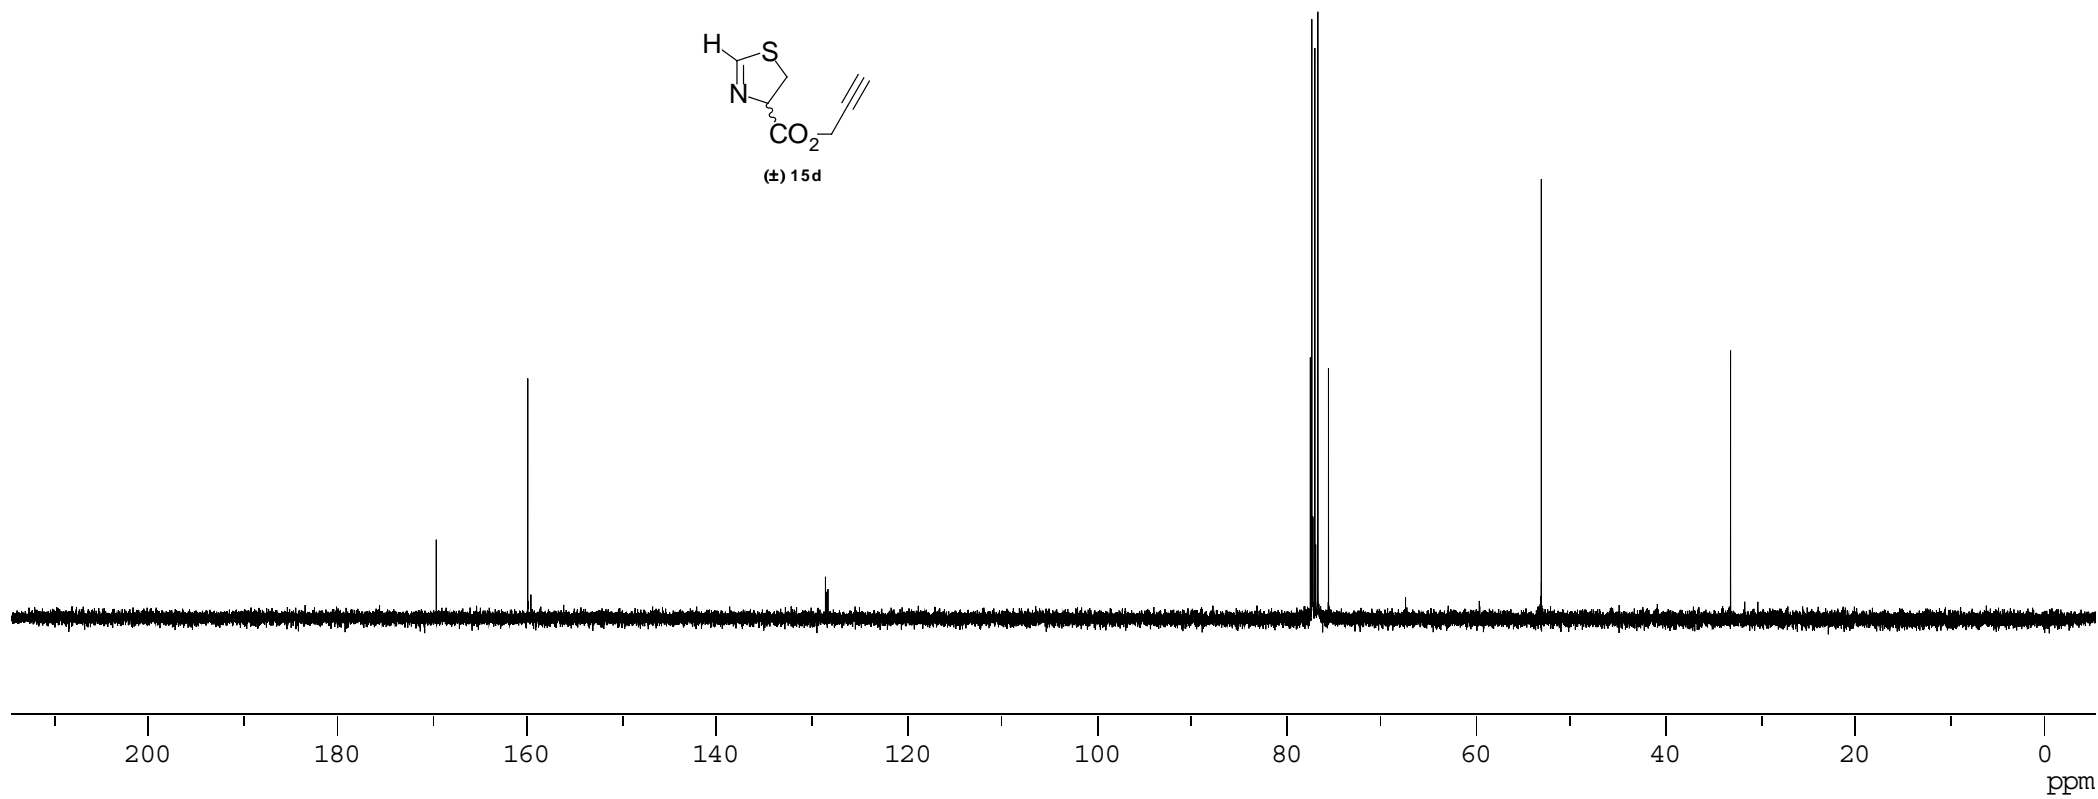

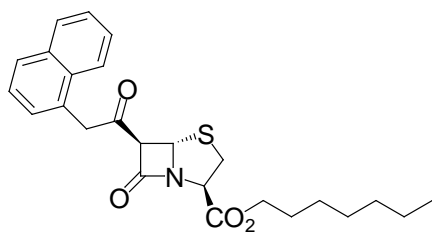

(±) 16a

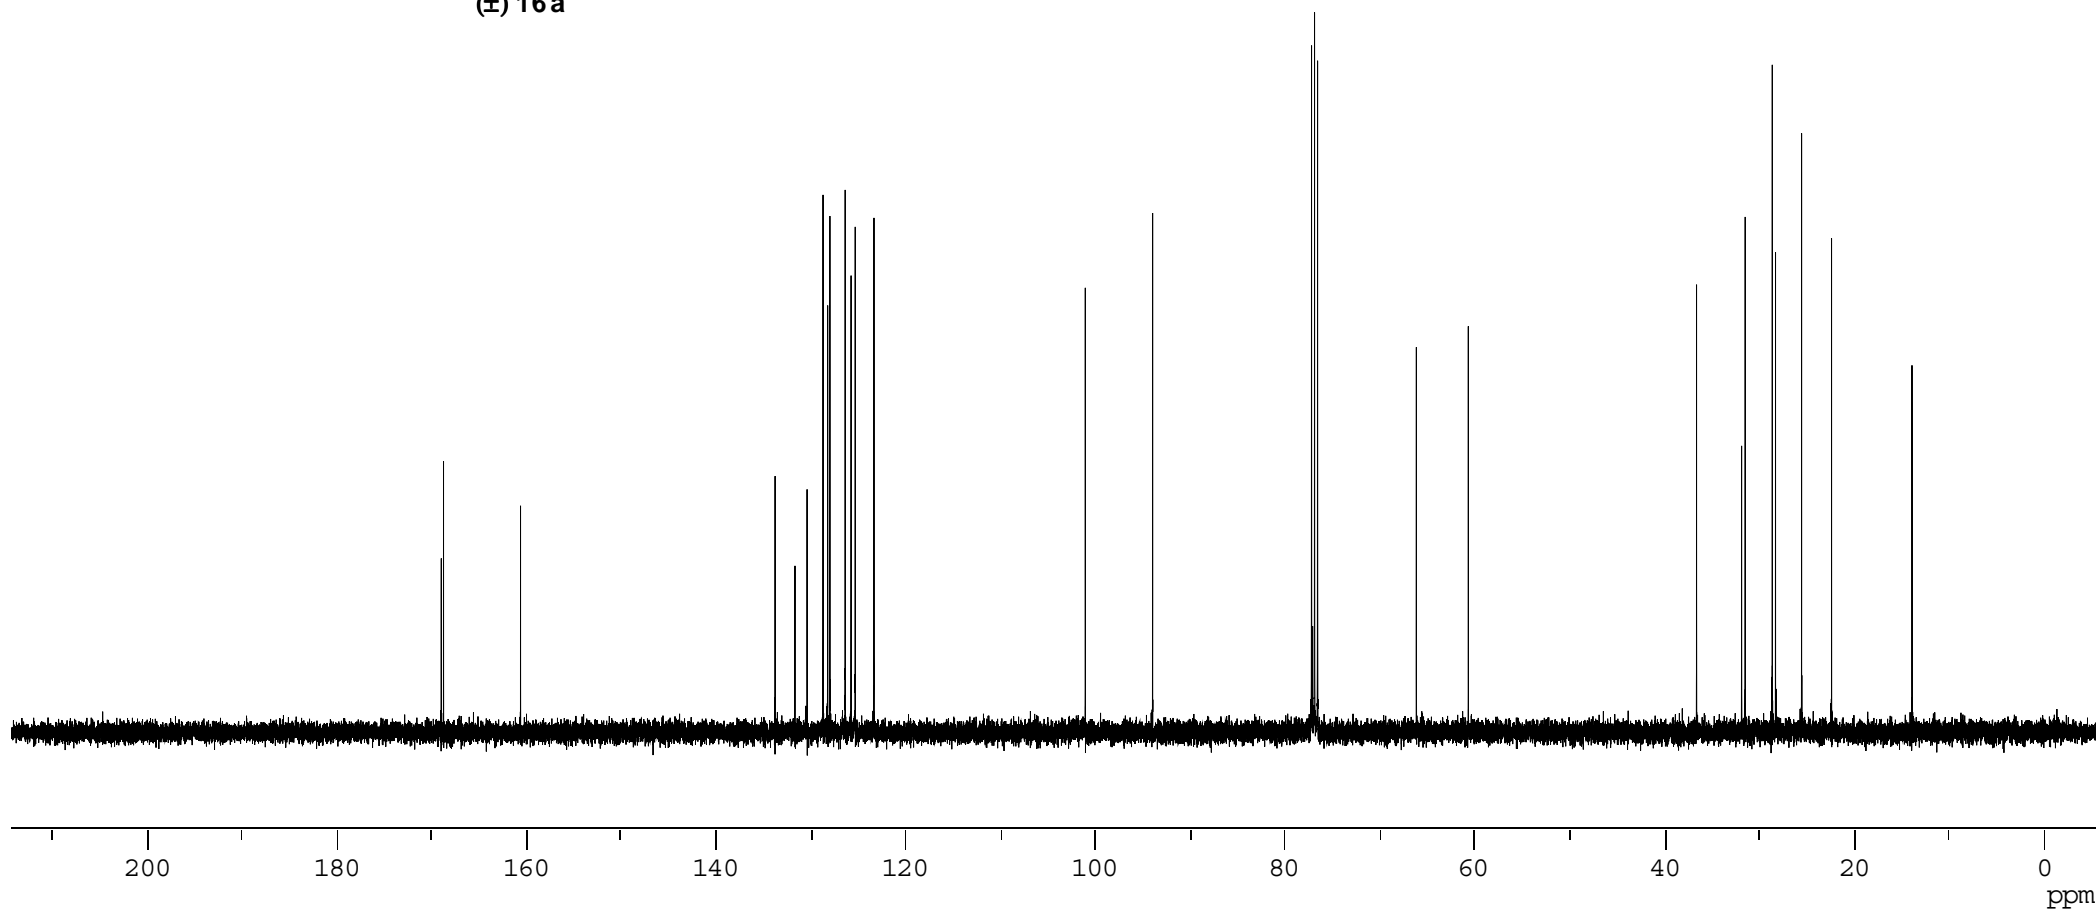

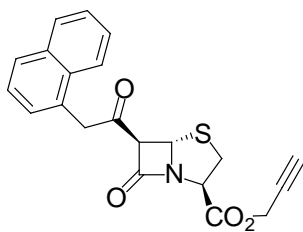

(±) 16b

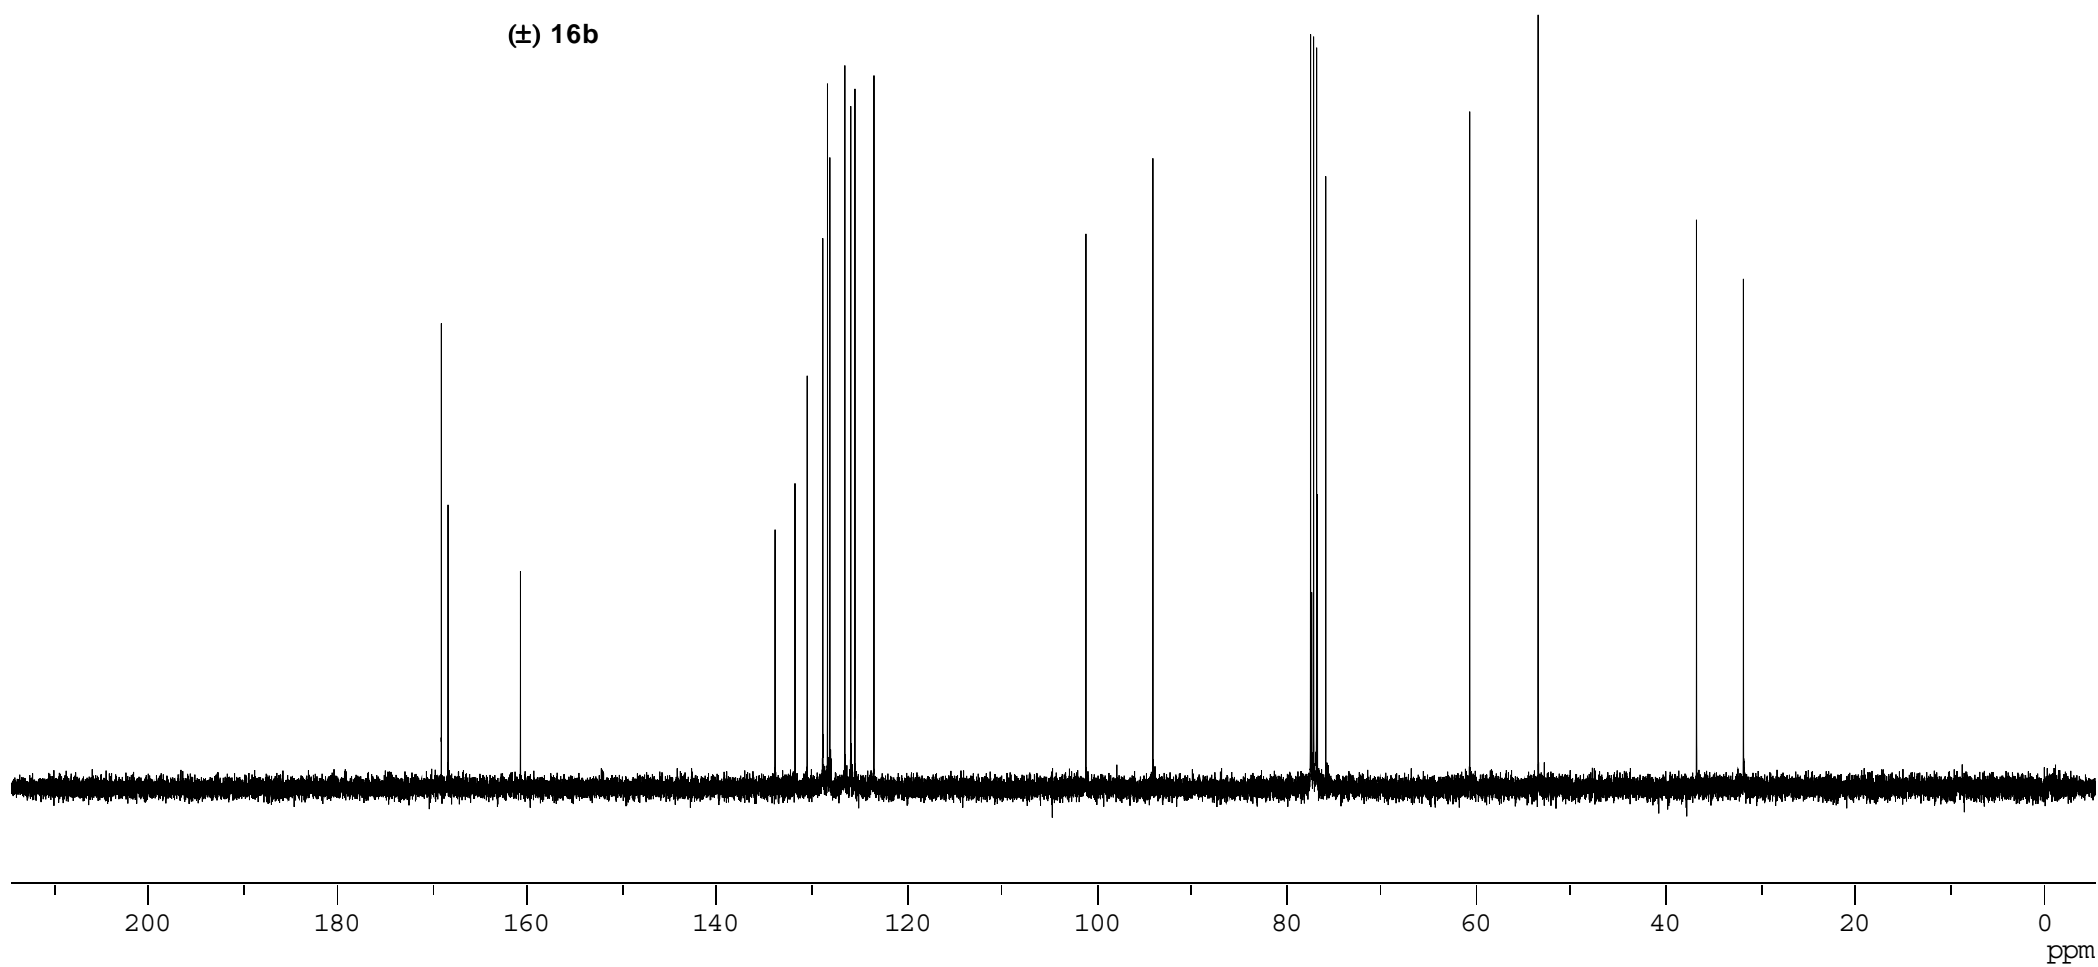

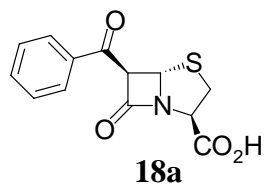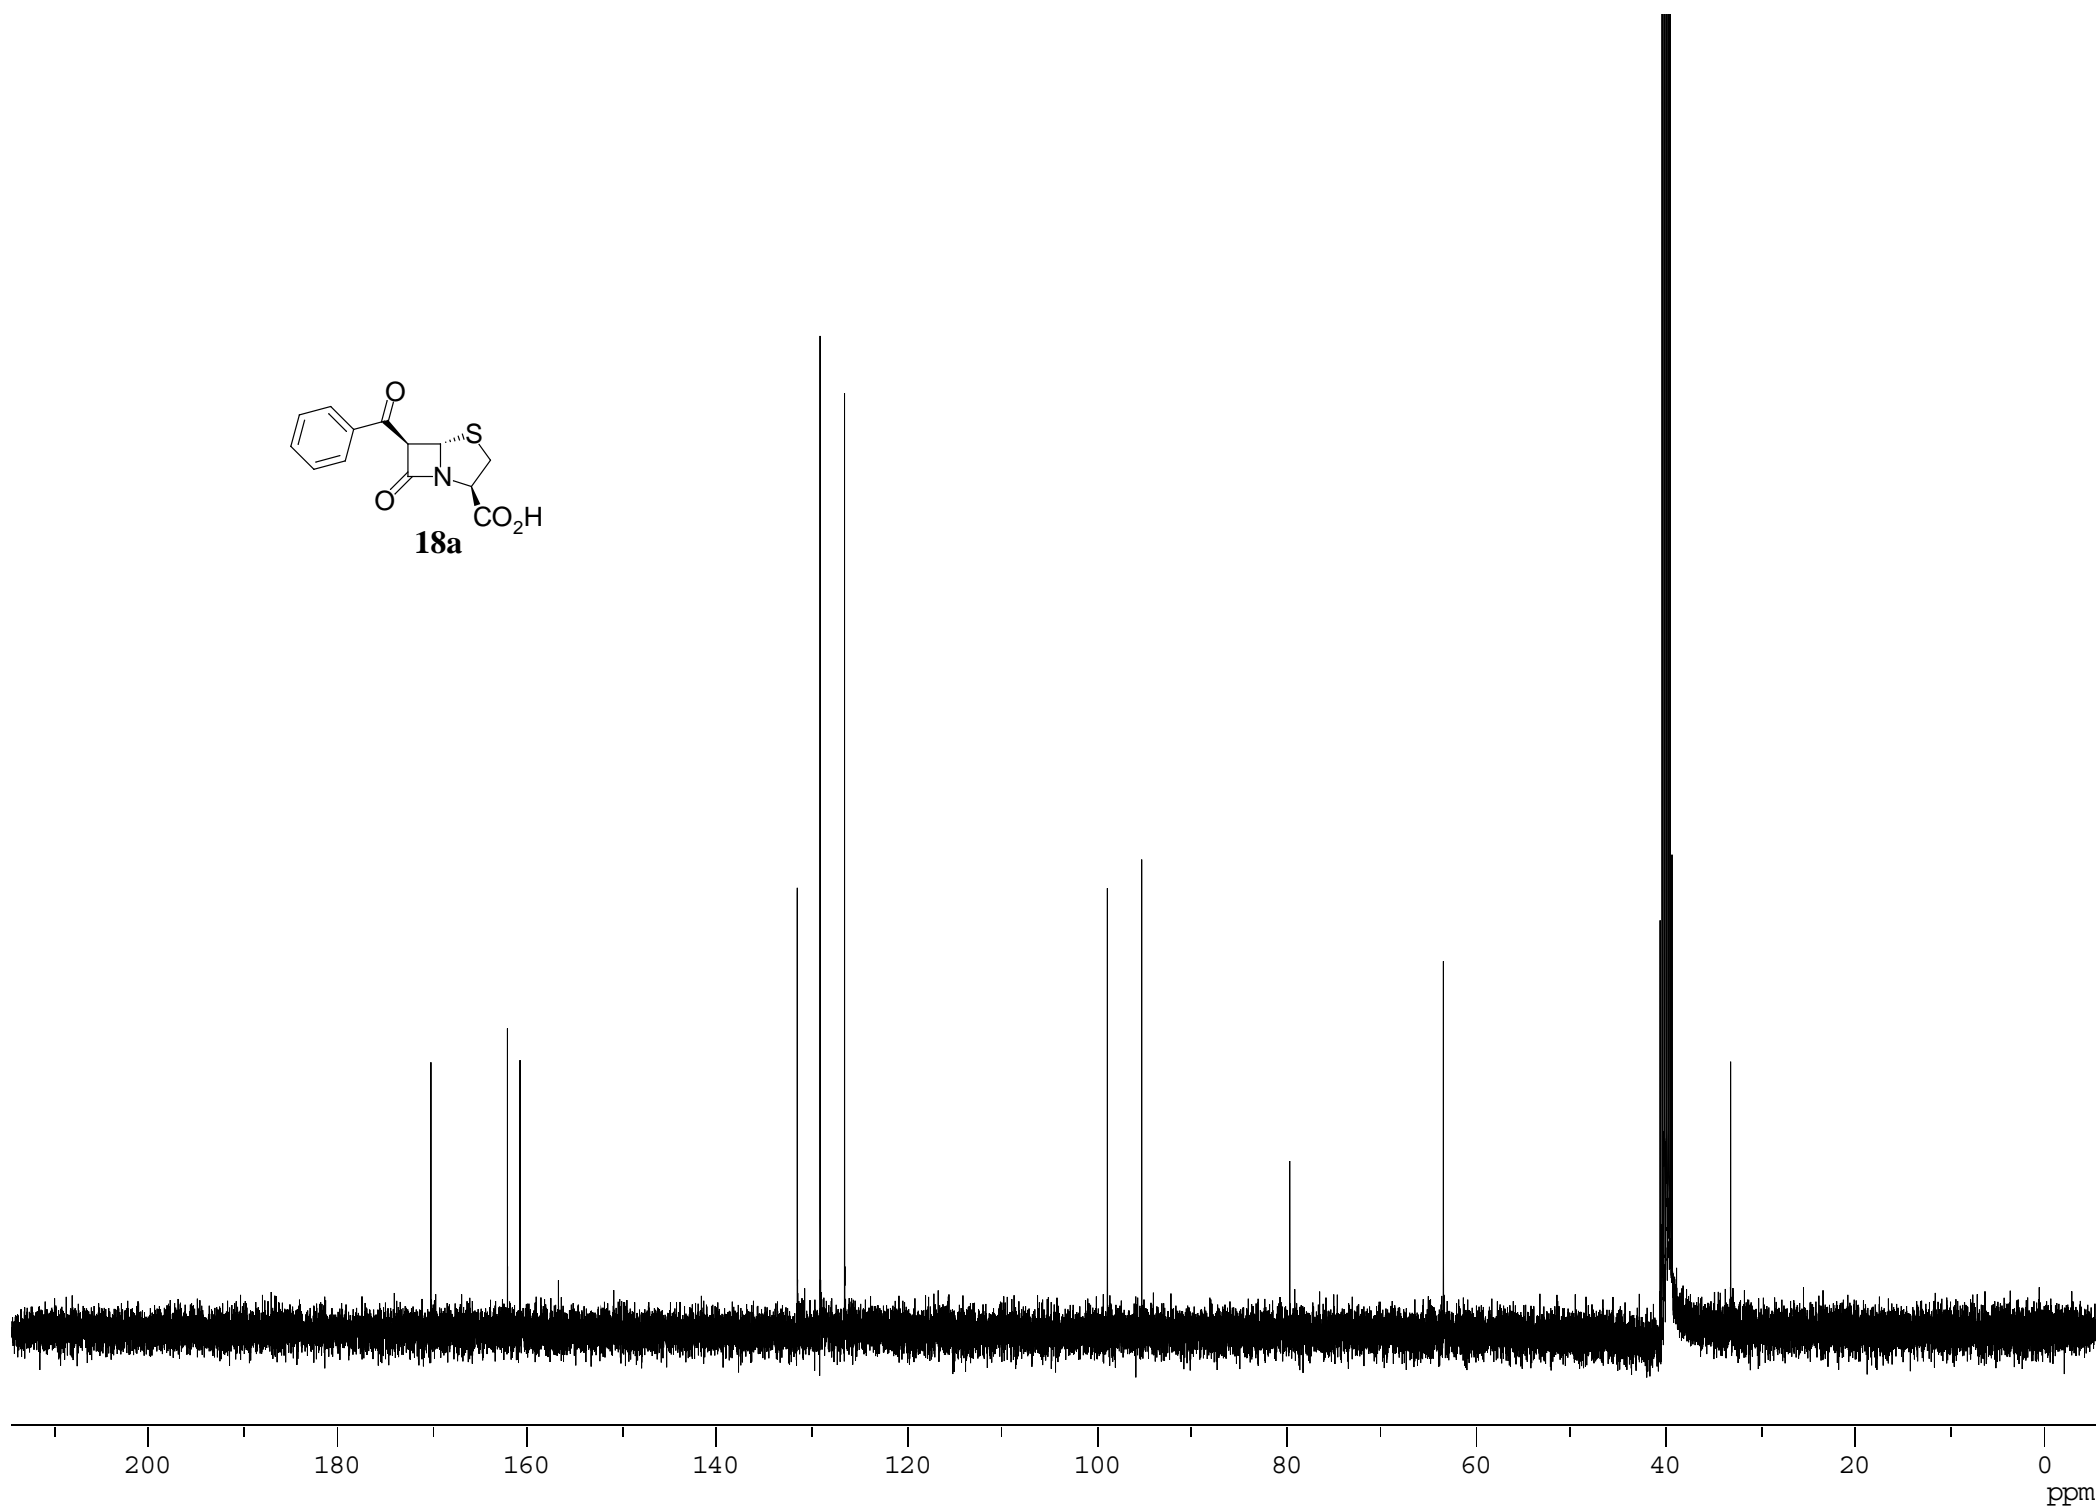

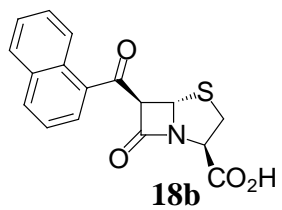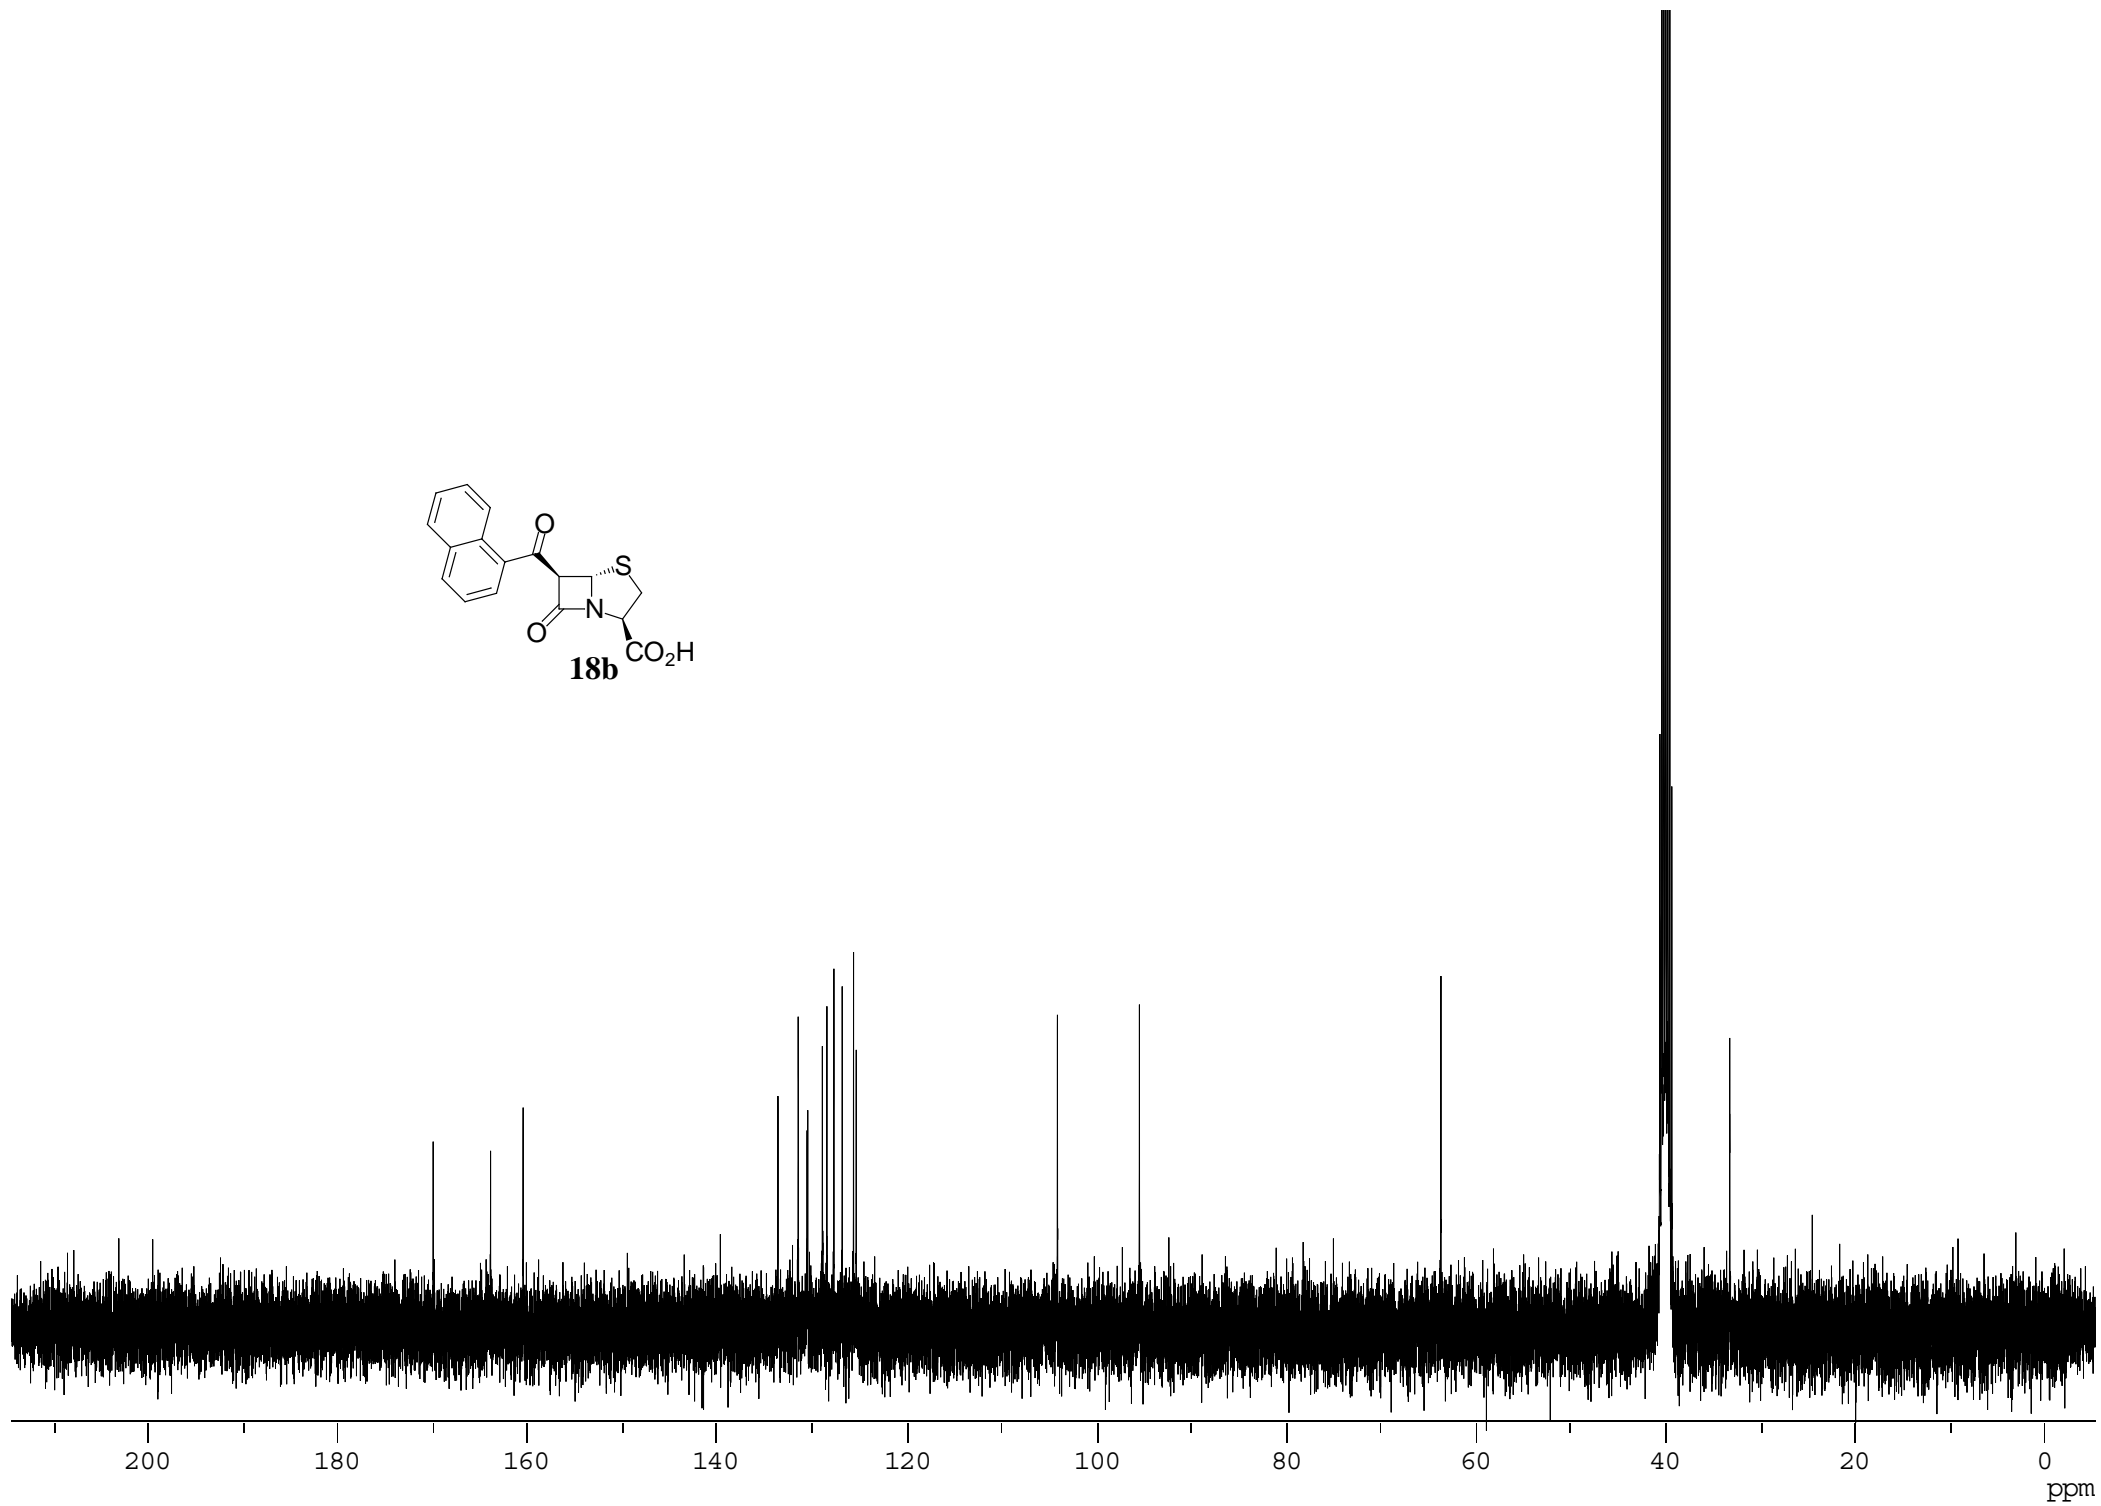

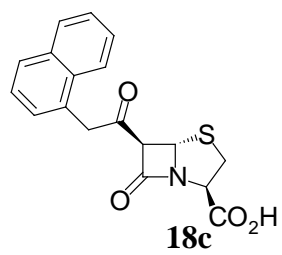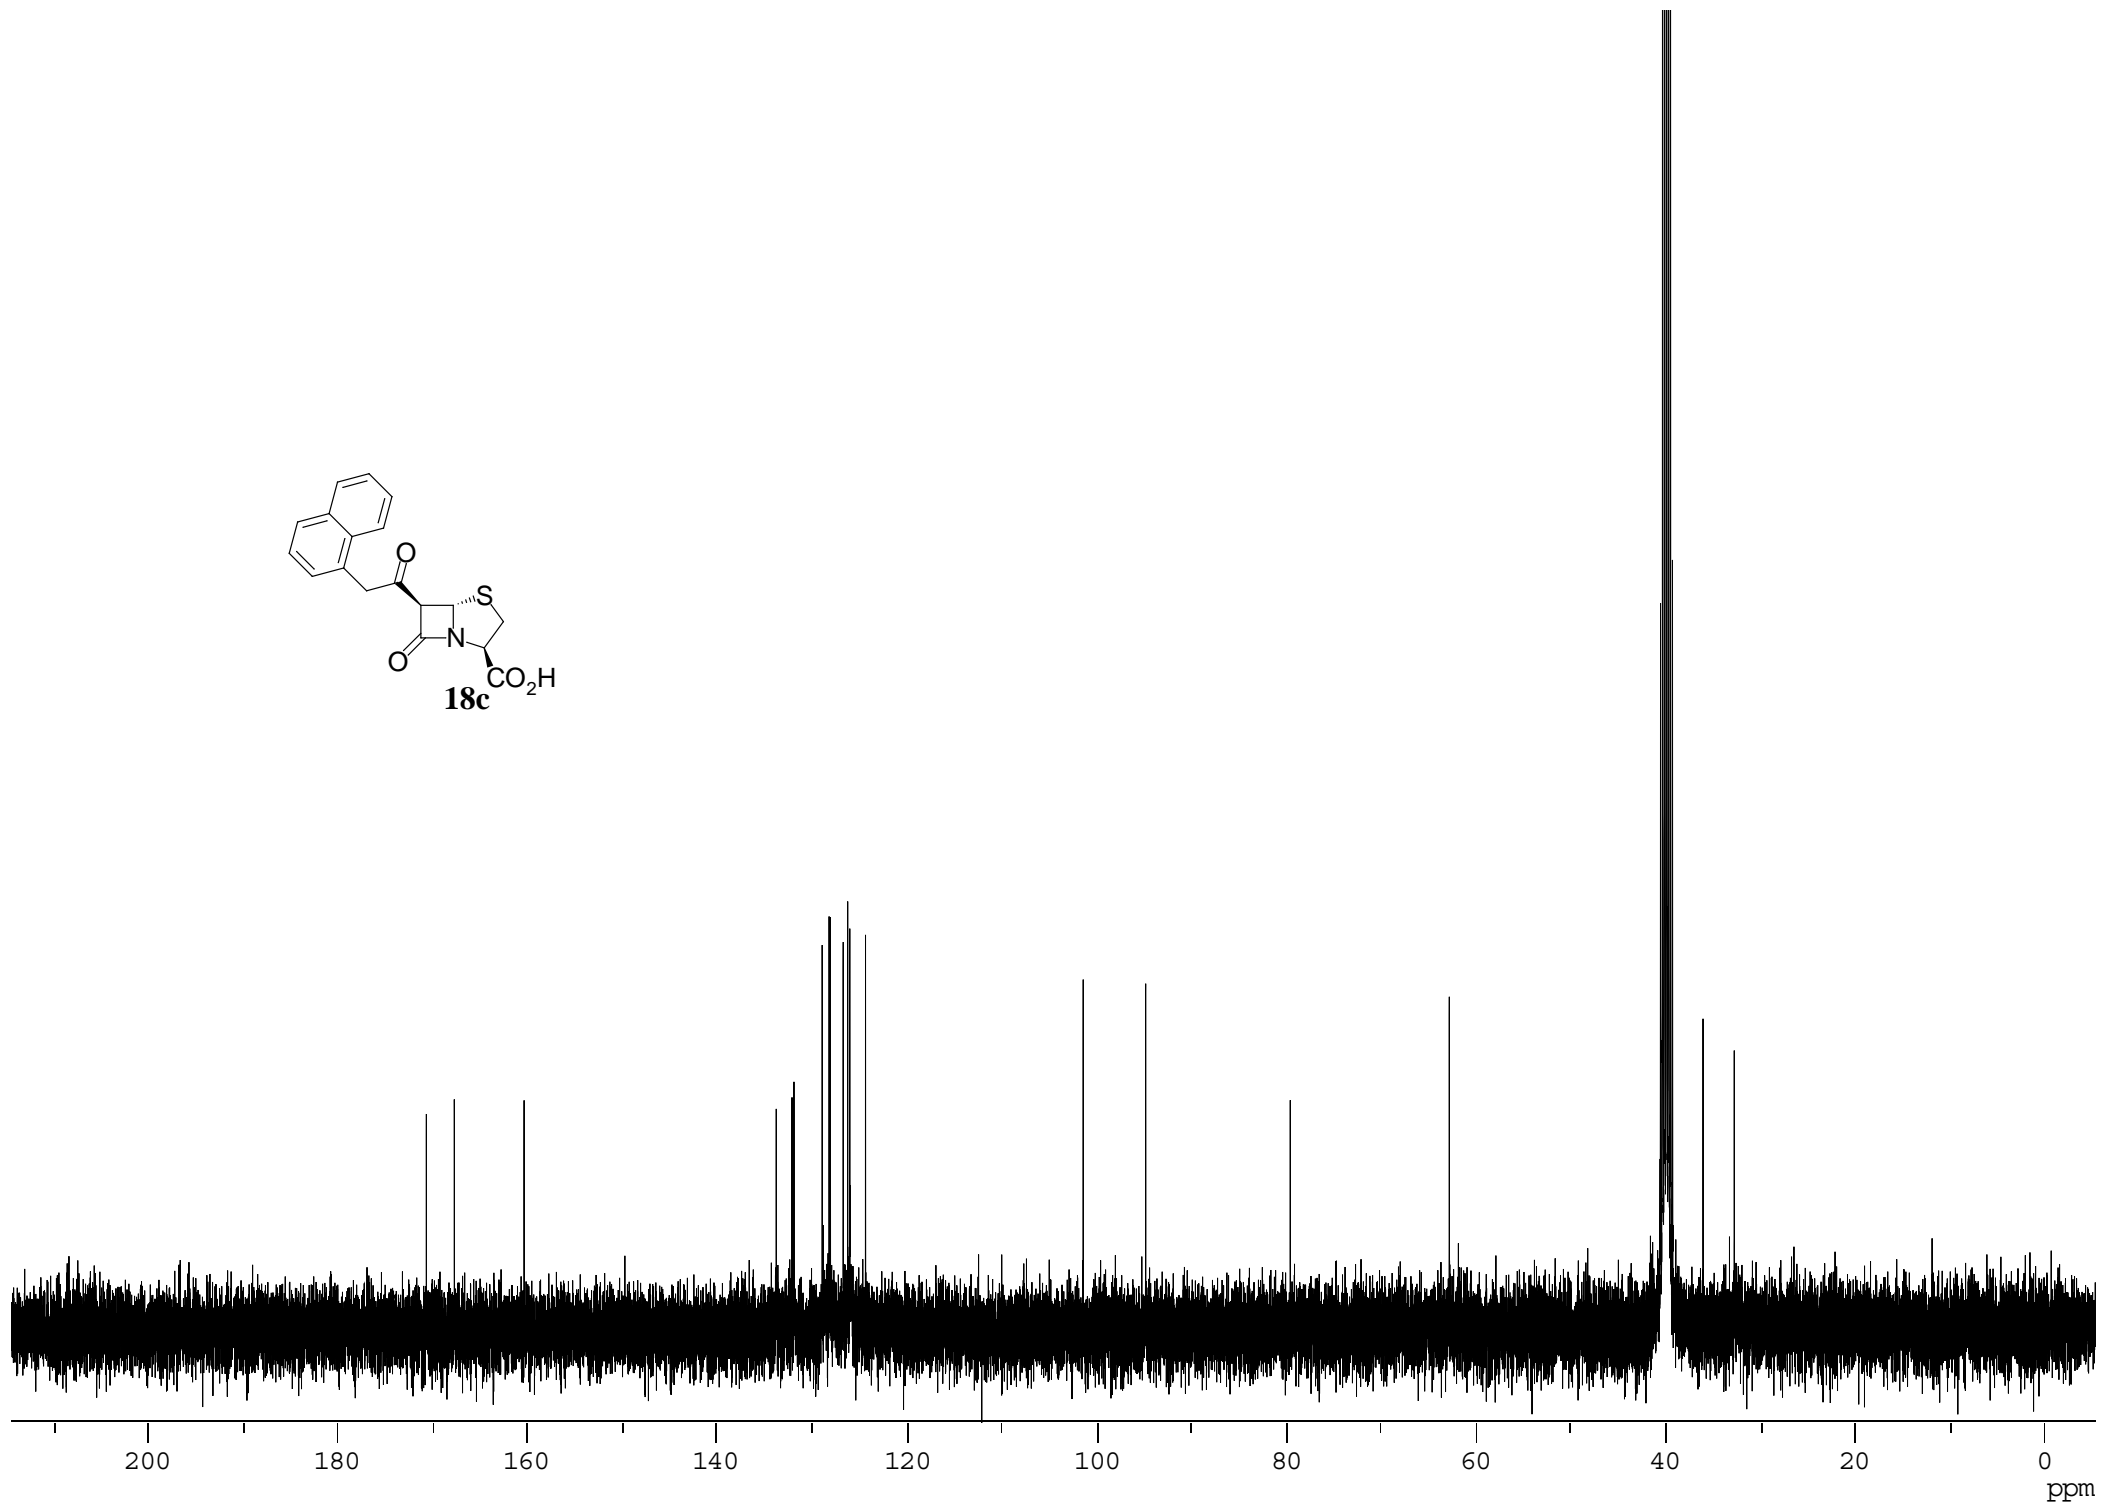



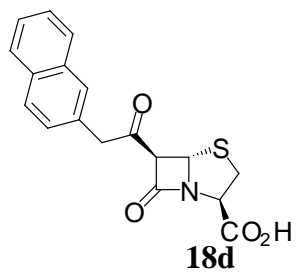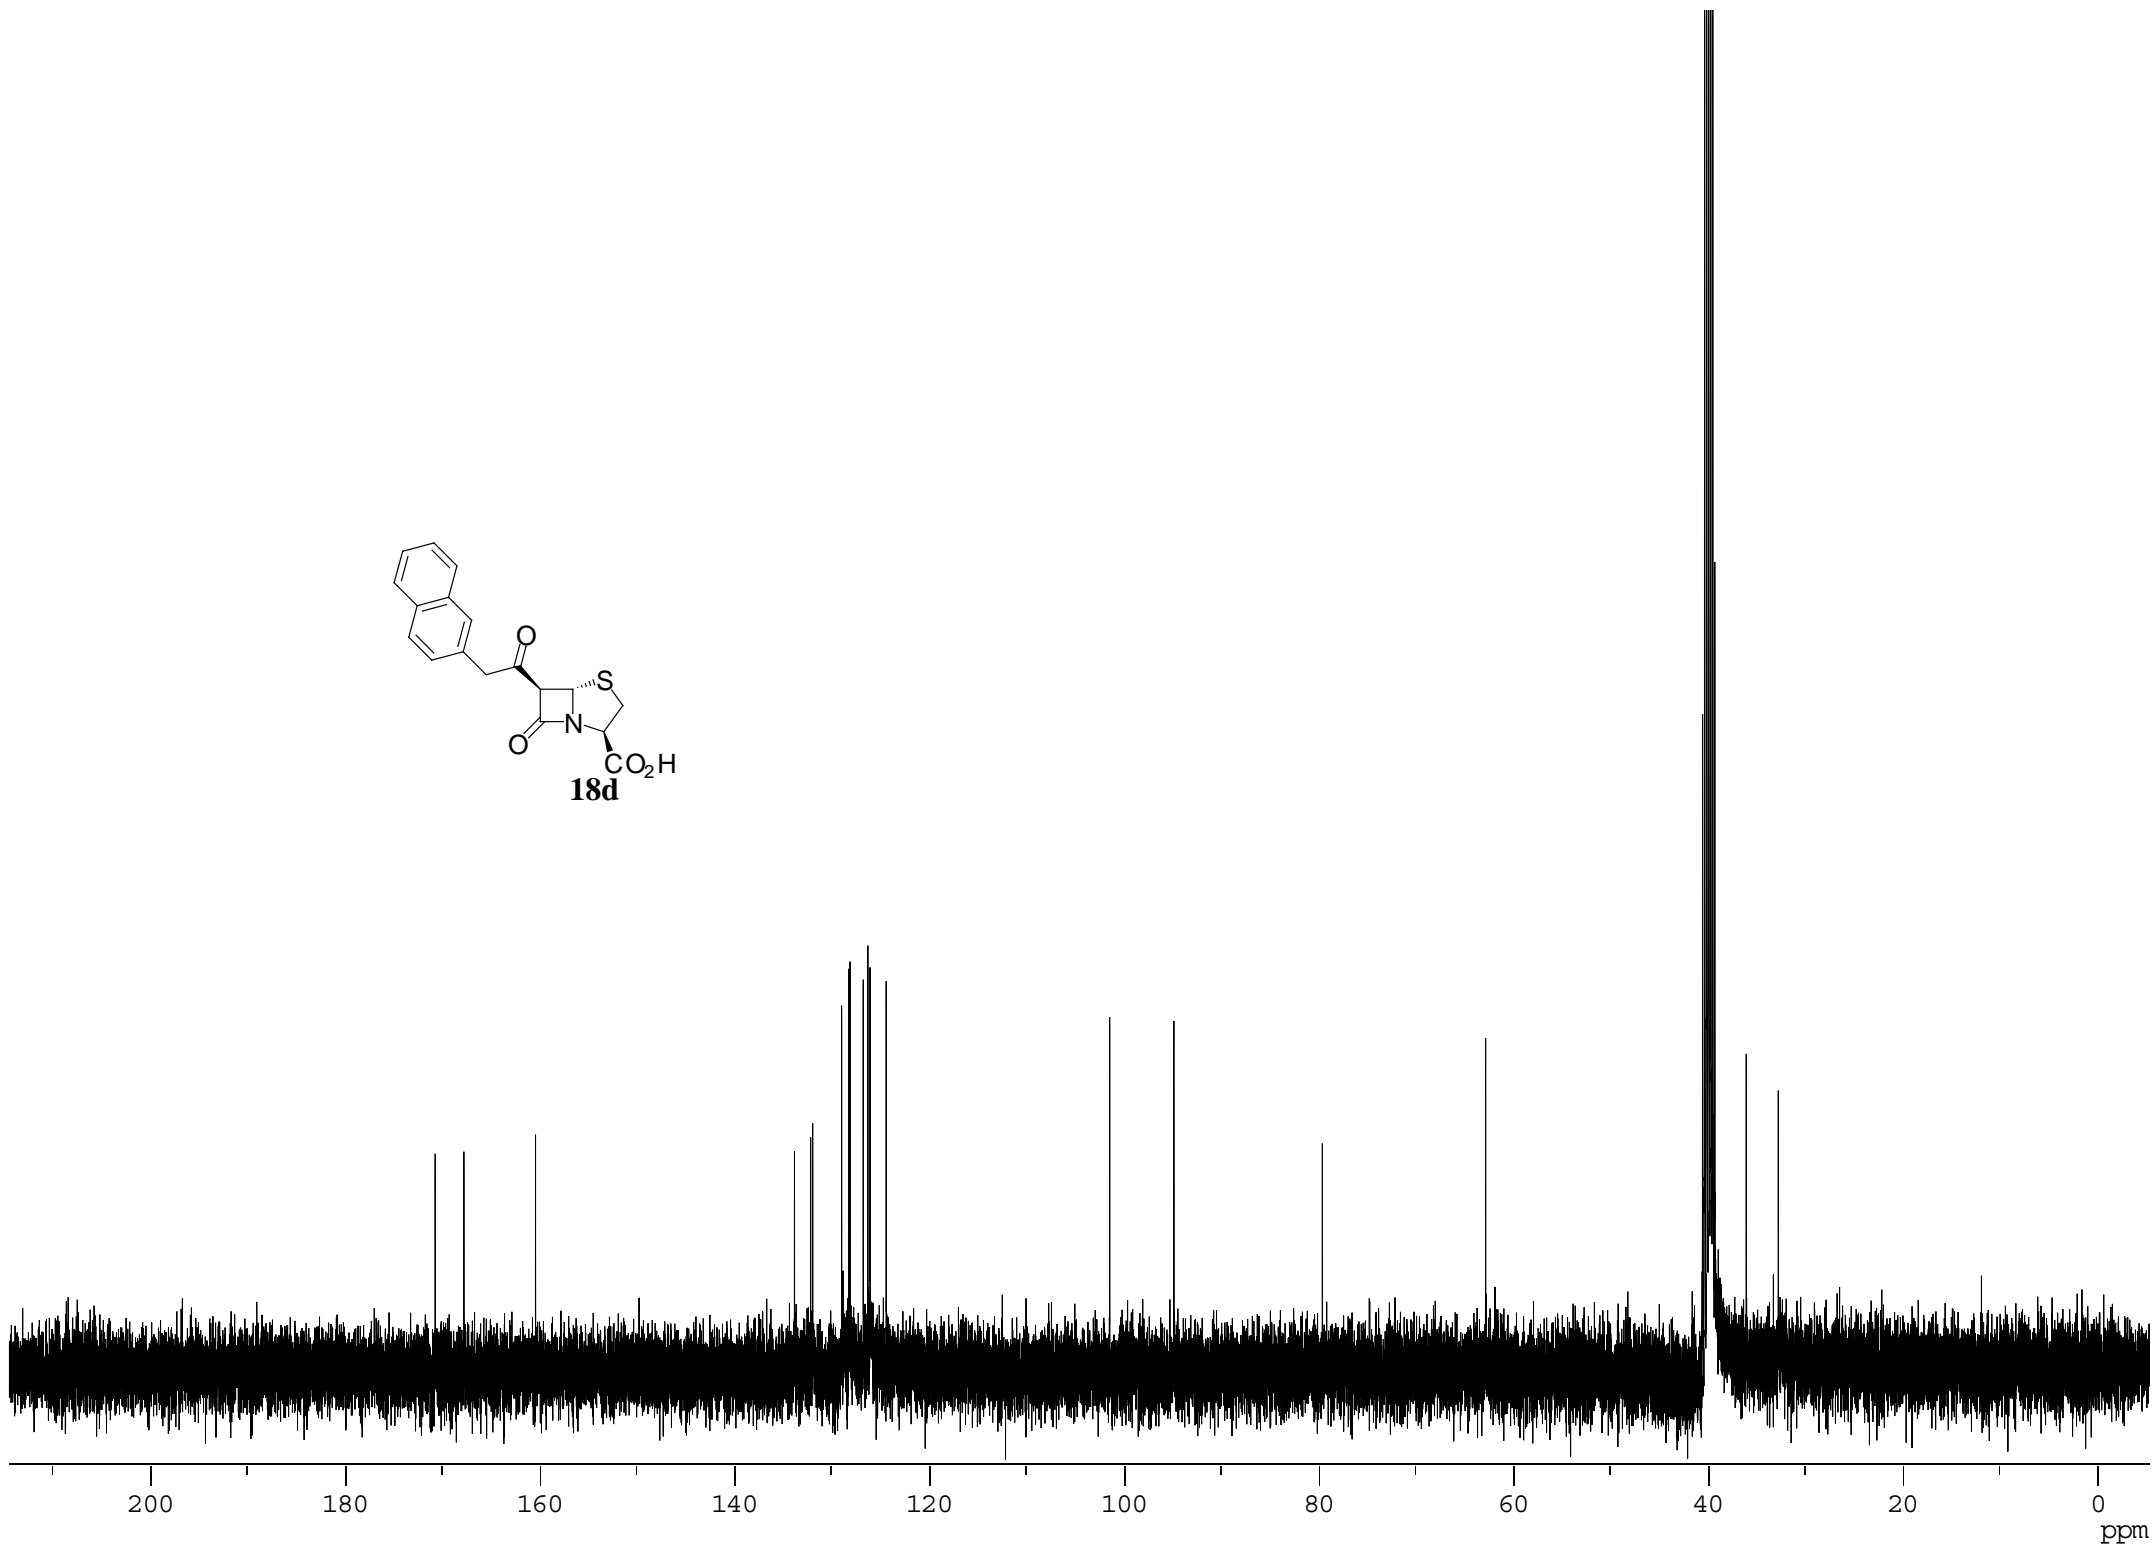

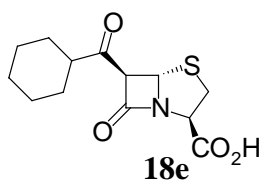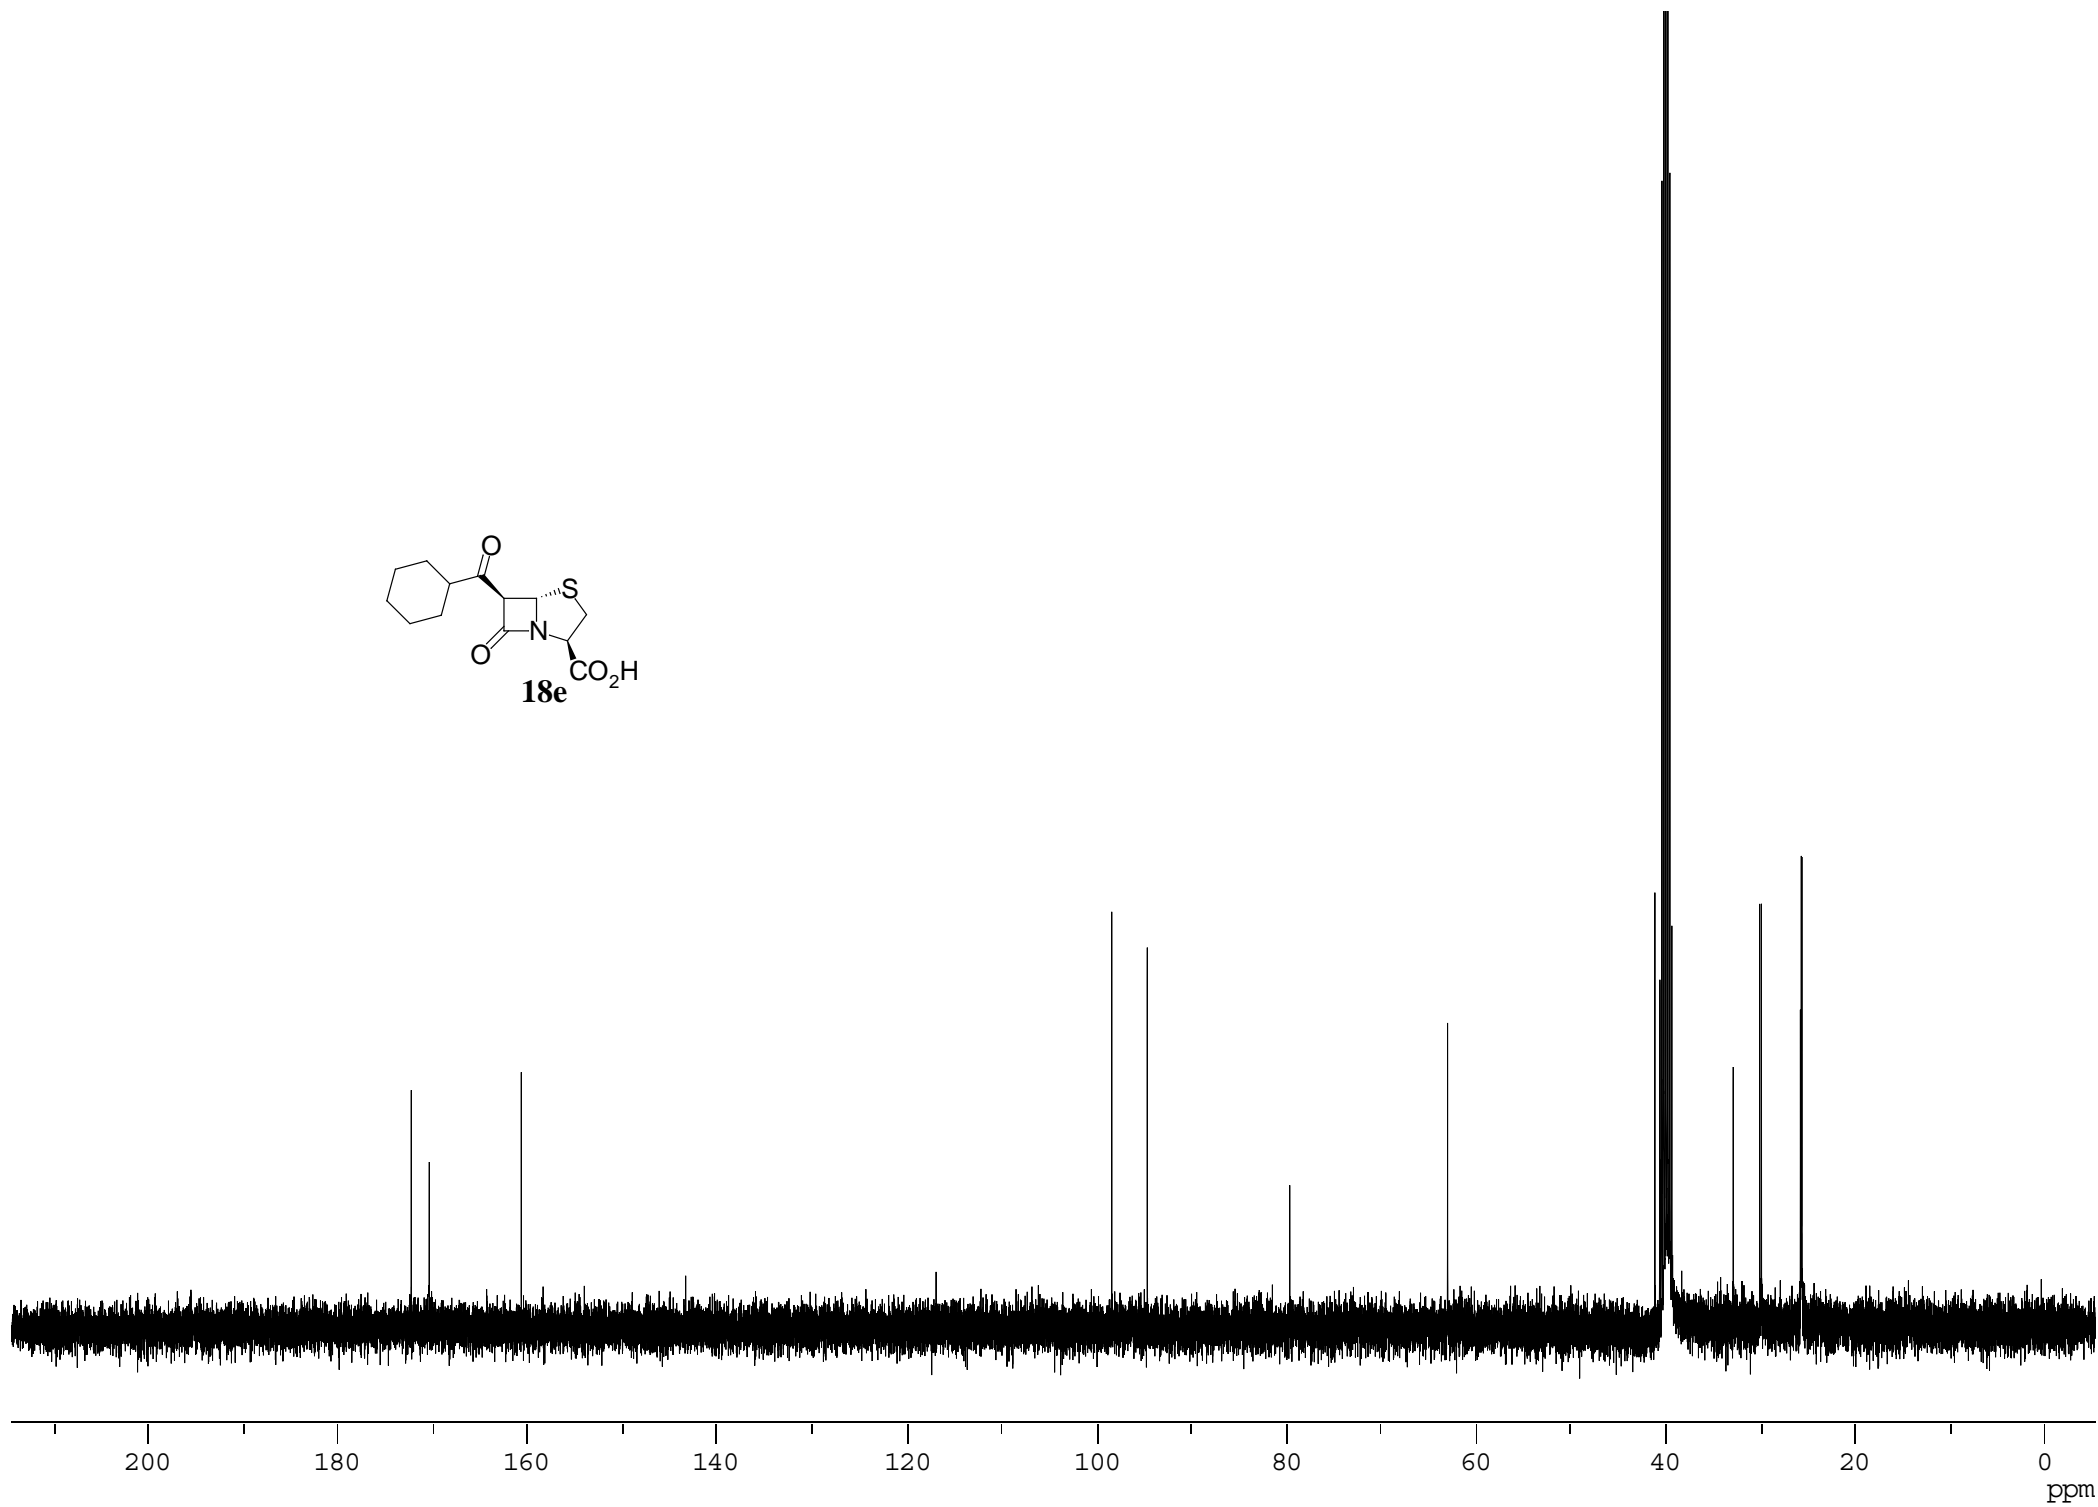

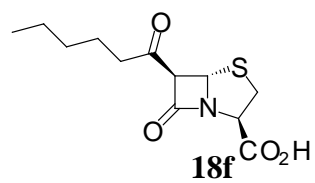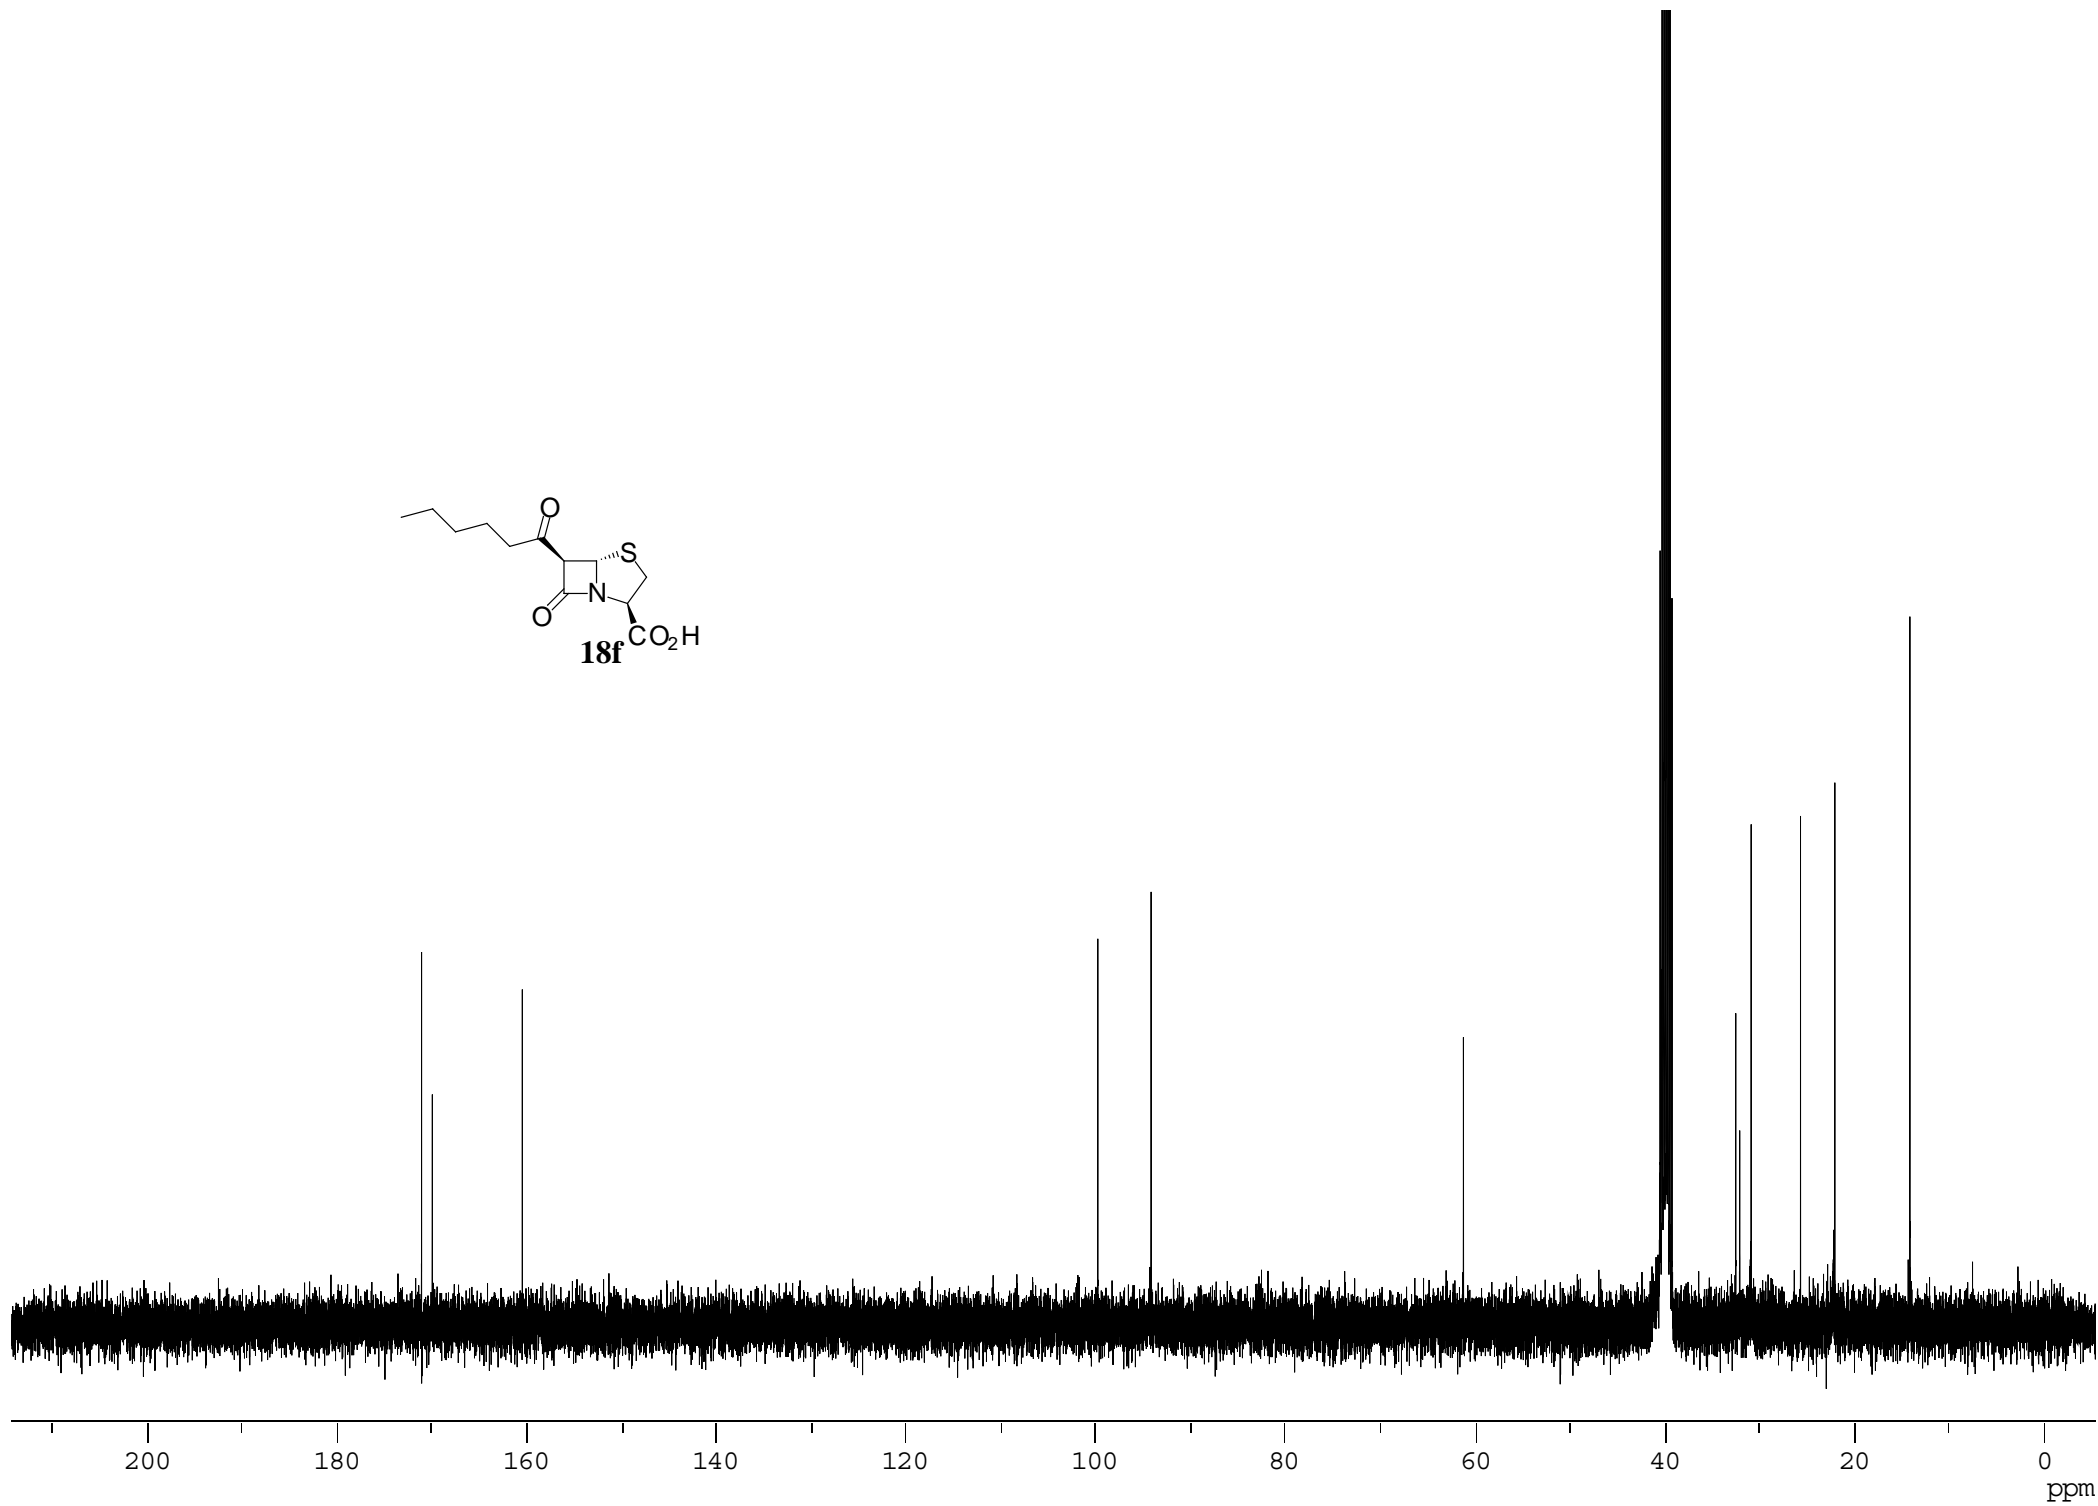

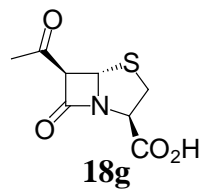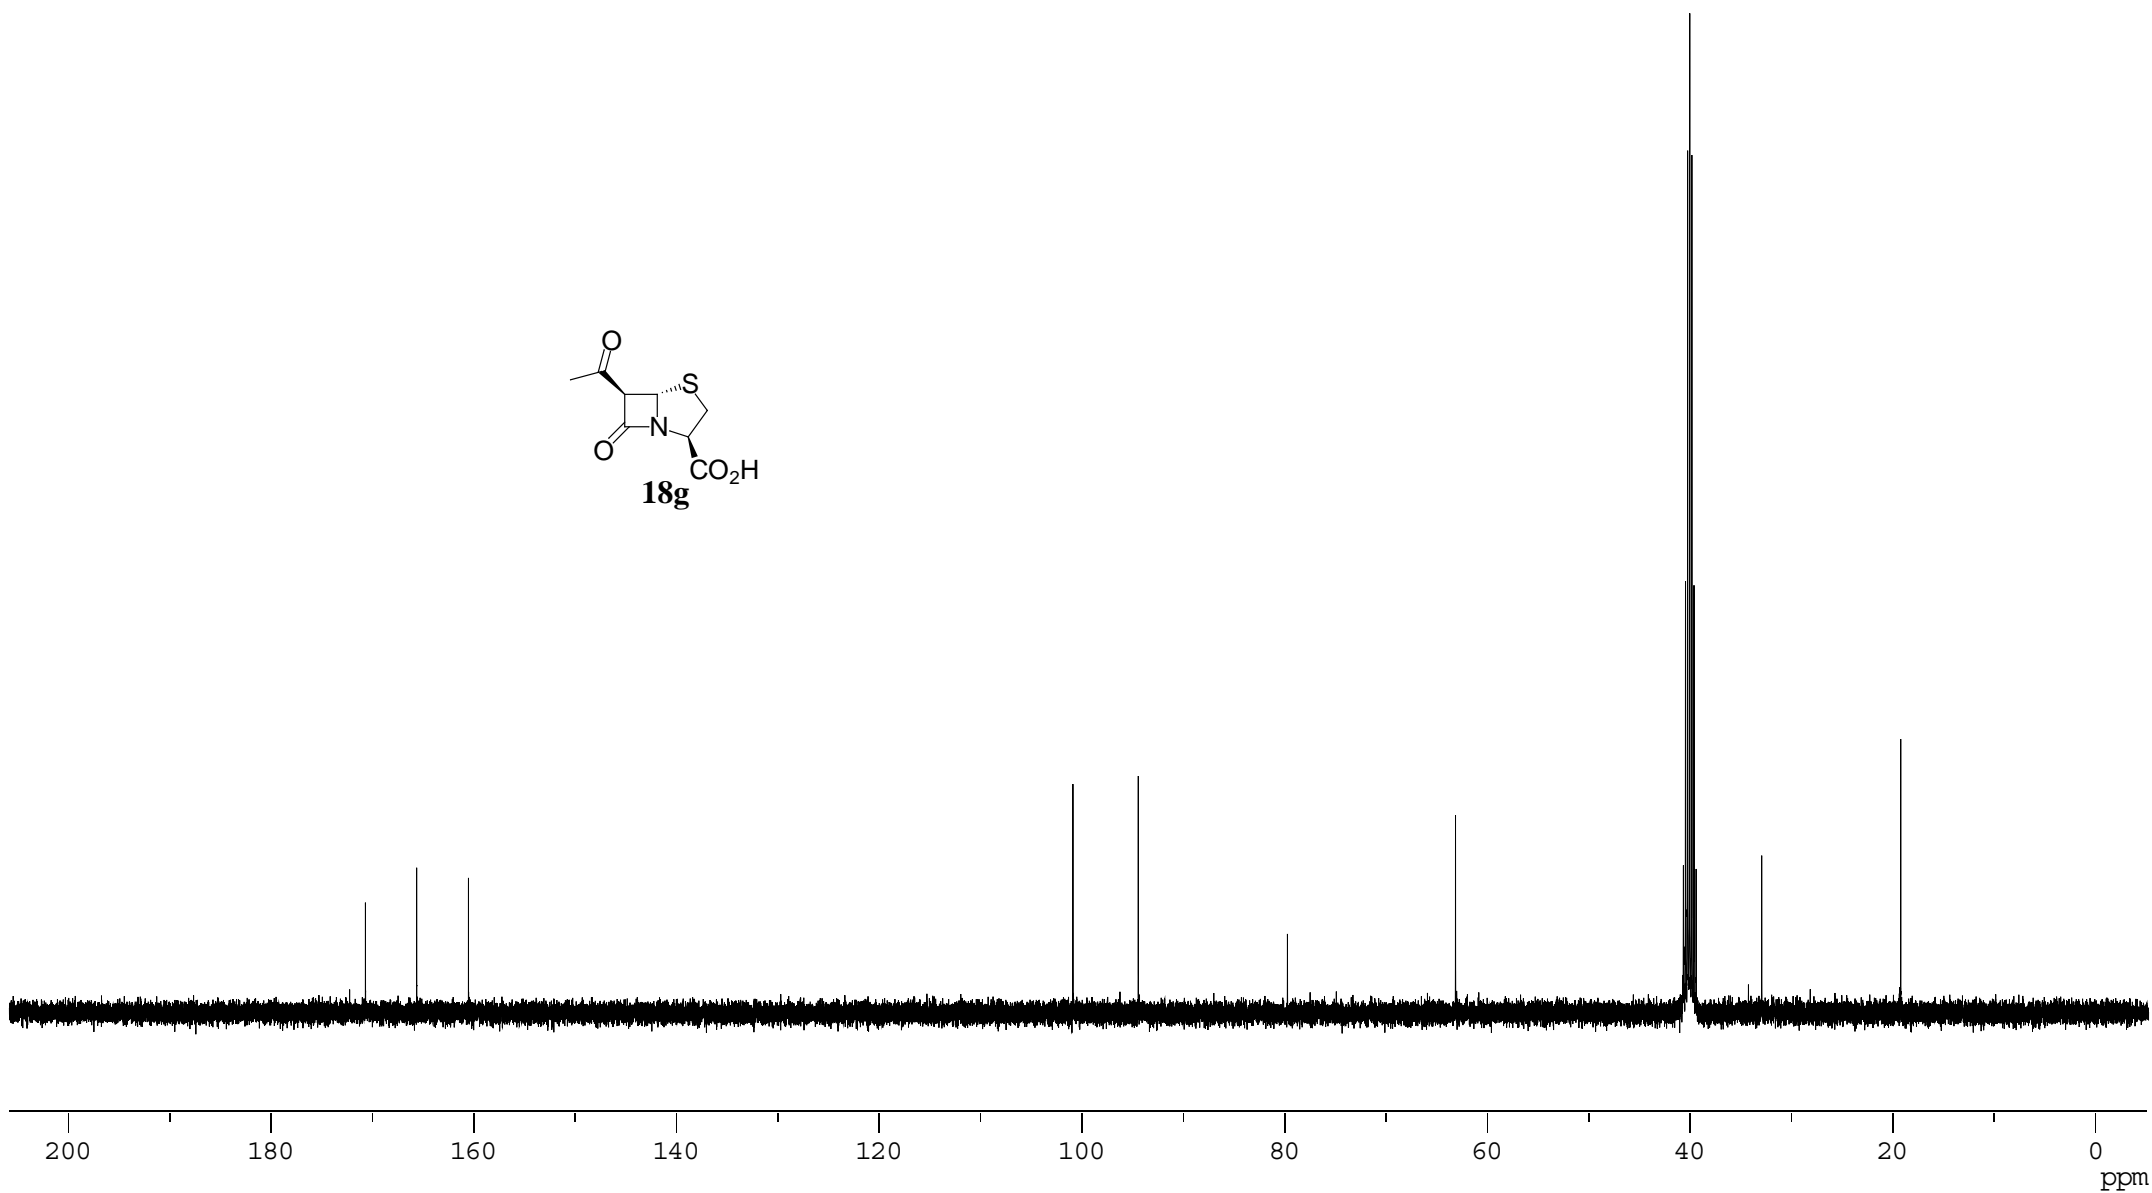

Supplement: b210551a.pdf [file b210551a.pdf]
